# Supplementary material for: Revealing the targets and mechanisms of vitamin A in the treatment of COVID-19
Source: Aging (Albany NY). 2020 Aug 15;12(15):15784–96. doi: 10.18632/aging.103888 (PMC7467385; doi:10.18632/aging.103888)
Supplement: Supplementary Table 1 [file aging-12-103888-s001..xlsx]

## Sheet: GO
Supplementary Table 1. Gene ontology analysis (biological process)using the identified seven core targets of VA against SARS-CoV-2.
ONTOLOGY	ID	Description	GeneRatio	BgRatio	pvalue	p.adjust	qvalue	geneID	Count	remark
BP	GO:0051090	regulation of DNA-binding transcription factor activity	6/7	432/18670	1.01803e-09	1.16869e-06	3.38627e-07	MAPK1/IL10/ICAM1/MAPK14/CAT/PRKCB	6
BP	GO:0072593	reactive oxygen species metabolic process	5/7	284/18670	1.61088e-08	9.24644e-06	2.67915e-06	IL10/EGFR/ICAM1/MAPK14/CAT	5
BP	GO:0007568	aging	5/7	321/18670	2.97388e-08	1.138e-05	3.29735e-06	MAPK1/IL10/ICAM1/MAPK14/CAT	5
BP	GO:0048608	reproductive structure development	5/7	431/18670	1.29518e-07	2.77479e-05	8.03992e-06	MAPK1/IL10/EGFR/ICAM1/MAPK14	5
BP	GO:0061458	reproductive system development	5/7	434/18670	1.34074e-07	2.77479e-05	8.03992e-06	MAPK1/IL10/EGFR/ICAM1/MAPK14	5
BP	GO:0001890	placenta development	4/7	152/18670	1.45024e-07	2.77479e-05	8.03992e-06	MAPK1/IL10/EGFR/MAPK14	4
BP	GO:2000377	regulation of reactive oxygen species metabolic process	4/7	195/18670	3.94112e-07	6.46343e-05	1.87277e-05	IL10/EGFR/ICAM1/MAPK14	4
BP	GO:0071222	cellular response to lipopolysaccharide	4/7	205/18670	4.81496e-07	6.90947e-05	2.00201e-05	MAPK1/IL10/ICAM1/MAPK14	4
BP	GO:0071219	cellular response to molecule of bacterial origin	4/7	212/18670	5.50746e-07	7.02507e-05	2.03551e-05	MAPK1/IL10/ICAM1/MAPK14	4
BP	GO:0000302	response to reactive oxygen species	4/7	232/18670	7.89777e-07	8.50829e-05	2.46527e-05	MAPK1/IL10/EGFR/CAT	4
BP	GO:0071216	cellular response to biotic stimulus	4/7	236/18670	8.45604e-07	8.50829e-05	2.46527e-05	MAPK1/IL10/ICAM1/MAPK14	4
BP	GO:0033002	muscle cell proliferation	4/7	239/18670	8.89368e-07	8.50829e-05	2.46527e-05	MAPK1/IL10/EGFR/MAPK14	4
BP	GO:0051091	positive regulation of DNA-binding transcription factor activity	4/7	261/18670	1.26398e-06	0.000104085	3.01585e-05	IL10/ICAM1/CAT/PRKCB	4
BP	GO:0046686	response to cadmium ion	3/7	63/18670	1.26933e-06	0.000104085	3.01585e-05	MAPK1/EGFR/CAT	3
BP	GO:0032868	response to insulin	4/7	272/18670	1.49018e-06	0.000114049	3.30455e-05	IL10/ICAM1/CAT/PRKCB	4
BP	GO:0018105	peptidyl-serine phosphorylation	4/7	299/18670	2.17268e-06	0.000152669	4.42356e-05	MAPK1/EGFR/MAPK14/PRKCB	4
BP	GO:0034599	cellular response to oxidative stress	4/7	302/18670	2.26077e-06	0.000152669	4.42356e-05	MAPK1/IL10/EGFR/CAT	4
BP	GO:0018209	peptidyl-serine modification	4/7	322/18670	2.91785e-06	0.000186094	5.39204e-05	MAPK1/EGFR/MAPK14/PRKCB	4
BP	GO:0032496	response to lipopolysaccharide	4/7	330/18670	3.21692e-06	0.000193723	5.61311e-05	MAPK1/IL10/ICAM1/MAPK14	4
BP	GO:0001892	embryonic placenta development	3/7	87/18670	3.37497e-06	0.000193723	5.61311e-05	MAPK1/IL10/EGFR	3
BP	GO:0002237	response to molecule of bacterial origin	4/7	343/18670	3.75082e-06	0.000205045	5.94115e-05	MAPK1/IL10/ICAM1/MAPK14	4
BP	GO:0010038	response to metal ion	4/7	364/18670	4.74906e-06	0.000247815	7.18039e-05	MAPK1/EGFR/ICAM1/CAT	4
BP	GO:0035690	cellular response to drug	4/7	369/18670	5.01328e-06	0.000250228	7.25033e-05	MAPK1/IL10/EGFR/ICAM1	4
BP	GO:2000379	positive regulation of reactive oxygen species metabolic process	3/7	102/18670	5.45387e-06	0.000260877	7.55888e-05	EGFR/ICAM1/MAPK14	3
BP	GO:0001503	ossification	4/7	398/18670	6.76741e-06	0.000310759	9.00422e-05	MAPK1/EGFR/MAPK14/CAT	4
BP	GO:0051222	positive regulation of protein transport	4/7	418/18670	8.21818e-06	0.000362864	0.000105139	MAPK1/IL10/EGFR/MAPK14	4
BP	GO:0043434	response to peptide hormone	4/7	436/18670	9.71076e-06	0.000402451	0.00011661	IL10/ICAM1/CAT/PRKCB	4
BP	GO:0014066	regulation of phosphatidylinositol 3-kinase signaling	3/7	124/18670	9.81588e-06	0.000402451	0.00011661	MAPK1/EGFR/CAT	3
BP	GO:0009314	response to radiation	4/7	448/18670	1.08118e-05	0.000411094	0.000119114	EGFR/ICAM1/MAPK14/CAT	4
BP	GO:0014854	response to inactivity	2/7	14/18670	1.09419e-05	0.000411094	0.000119114	IL10/CAT	2
BP	GO:0006979	response to oxidative stress	4/7	451/18670	1.1101e-05	0.000411094	0.000119114	MAPK1/IL10/EGFR/CAT	4
BP	GO:1904951	positive regulation of establishment of protein localization	4/7	456/18670	1.15956e-05	0.000415992	0.000120533	MAPK1/IL10/EGFR/MAPK14	4
BP	GO:0032355	response to estradiol	3/7	134/18670	1.239e-05	0.000431023	0.000124888	IL10/EGFR/CAT	3
BP	GO:0002739	regulation of cytokine secretion involved in immune response	2/7	16/18670	1.44238e-05	0.000487015	0.000141112	IL10/MAPK14	2	immunity
BP	GO:0051384	response to glucocorticoid	3/7	146/18670	1.60245e-05	0.000514533	0.000149085	IL10/EGFR/ICAM1	3
BP	GO:0031667	response to nutrient levels	4/7	499/18670	1.65533e-05	0.000514533	0.000149085	MAPK1/EGFR/ICAM1/CAT	4
BP	GO:0014065	phosphatidylinositol 3-kinase signaling	3/7	148/18670	1.66914e-05	0.000514533	0.000149085	MAPK1/EGFR/CAT	3
BP	GO:0051092	positive regulation of NF-kappaB transcription factor activity	3/7	149/18670	1.70316e-05	0.000514533	0.000149085	ICAM1/CAT/PRKCB	3
BP	GO:0031960	response to corticosteroid	3/7	162/18670	2.18796e-05	0.000644045	0.000186611	IL10/EGFR/ICAM1	3
BP	GO:0002374	cytokine secretion involved in immune response	2/7	20/18670	2.28214e-05	0.000654973	0.000189778	IL10/MAPK14	2	immunity
BP	GO:0034614	cellular response to reactive oxygen species	3/7	168/18670	2.43944e-05	0.000683045	0.000197911	MAPK1/IL10/EGFR	3
BP	GO:0048015	phosphatidylinositol-mediated signaling	3/7	181/18670	3.04824e-05	0.000833185	0.000241414	MAPK1/EGFR/CAT	3
BP	GO:0048017	inositol lipid-mediated signaling	3/7	184/18670	3.20165e-05	0.000854767	0.000247668	MAPK1/EGFR/CAT	3
BP	GO:0071549	cellular response to dexamethasone stimulus	2/7	30/18670	5.21556e-05	0.00133055	0.000385525	EGFR/ICAM1	2
BP	GO:0097421	liver regeneration	2/7	30/18670	5.21556e-05	0.00133055	0.000385525	IL10/EGFR	2
BP	GO:0045907	positive regulation of vasoconstriction	2/7	32/18670	5.94482e-05	0.00148362	0.000429877	EGFR/ICAM1	2
BP	GO:0009743	response to carbohydrate	3/7	230/18670	6.22731e-05	0.00152105	0.000440723	ICAM1/CAT/PRKCB	3
BP	GO:0071392	cellular response to estradiol stimulus	2/7	36/18670	7.54548e-05	0.00180463	0.000522889	IL10/EGFR	2
BP	GO:0042307	positive regulation of protein import into nucleus	2/7	37/18670	7.97522e-05	0.00183111	0.000530562	MAPK1/MAPK14	2
BP	GO:0071276	cellular response to cadmium ion	2/7	37/18670	7.97522e-05	0.00183111	0.000530562	MAPK1/EGFR	2
BP	GO:0060045	positive regulation of cardiac muscle cell proliferation	2/7	38/18670	8.41679e-05	0.0018946	0.000548959	MAPK1/MAPK14	2
BP	GO:0043406	positive regulation of MAP kinase activity	3/7	258/18670	8.76245e-05	0.00192131	0.000556698	MAPK1/EGFR/MAPK14	3
BP	GO:1904591	positive regulation of protein import	2/7	39/18670	8.87017e-05	0.00192131	0.000556698	MAPK1/MAPK14	2
BP	GO:0071548	response to dexamethasone	2/7	40/18670	9.33535e-05	0.00198463	0.000575043	EGFR/ICAM1	2
BP	GO:0050714	positive regulation of protein secretion	3/7	268/18670	9.80972e-05	0.00204756	0.000593277	IL10/EGFR/MAPK14	3
BP	GO:0045927	positive regulation of growth	3/7	270/18670	0.000100286	0.00205586	0.000595682	MAPK1/EGFR/MAPK14	3
BP	GO:0098742	cell-cell adhesion via plasma-membrane adhesion molecules	3/7	273/18670	0.000103628	0.00208711	0.000604736	IL10/ICAM1/MAPK14	3
BP	GO:0051403	stress-activated MAPK cascade	3/7	286/18670	0.000118957	0.00231872	0.000671846	MAPK1/EGFR/MAPK14	3
BP	GO:0002793	positive regulation of peptide secretion	3/7	288/18670	0.00012144	0.00231872	0.000671846	IL10/EGFR/MAPK14	3
BP	GO:0002437	inflammatory response to antigenic stimulus	2/7	46/18670	0.00012374	0.00231872	0.000671846	IL10/ICAM1	2	inflammatory
BP	GO:0060711	labyrinthine layer development	2/7	46/18670	0.00012374	0.00231872	0.000671846	MAPK1/IL10	2
BP	GO:0071356	cellular response to tumor necrosis factor	3/7	291/18670	0.000125227	0.00231872	0.000671846	MAPK1/ICAM1/MAPK14	3
BP	GO:0070849	response to epidermal growth factor	2/7	47/18670	0.000129217	0.00235461	0.000682246	MAPK1/EGFR	2
BP	GO:0055023	positive regulation of cardiac muscle tissue growth	2/7	48/18670	0.000134811	0.00241817	0.00070066	MAPK1/MAPK14	2
BP	GO:0009895	negative regulation of catabolic process	3/7	308/18670	0.000148157	0.00261668	0.000758179	IL10/EGFR/MAPK14	3
BP	GO:0034612	response to tumor necrosis factor	3/7	312/18670	0.000153924	0.00266339	0.000771714	MAPK1/ICAM1/MAPK14	3
BP	GO:0031098	stress-activated protein kinase signaling cascade	3/7	315/18670	0.000158344	0.00266339	0.000771714	MAPK1/EGFR/MAPK14	3
BP	GO:0060421	positive regulation of heart growth	2/7	52/18670	0.000158361	0.00266339	0.000771714	MAPK1/MAPK14	2
BP	GO:0070371	ERK1 and ERK2 cascade	3/7	317/18670	0.000161337	0.00266339	0.000771714	MAPK1/EGFR/ICAM1	3
BP	GO:0000186	activation of MAPKK activity	2/7	53/18670	0.000164542	0.00266339	0.000771714	MAPK1/EGFR	2
BP	GO:0032655	regulation of interleukin-12 production	2/7	54/18670	0.00017084	0.00266339	0.000771714	IL10/MAPK14	2
BP	GO:1903829	positive regulation of cellular protein localization	3/7	324/18670	0.000172102	0.00266339	0.000771714	MAPK1/EGFR/MAPK14	3
BP	GO:0046677	response to antibiotic	3/7	327/18670	0.000176856	0.00266339	0.000771714	IL10/ICAM1/CAT	3
BP	GO:0042306	regulation of protein import into nucleus	2/7	55/18670	0.000177255	0.00266339	0.000771714	MAPK1/MAPK14	2
BP	GO:0032615	interleukin-12 production	2/7	56/18670	0.000183787	0.00266339	0.000771714	IL10/MAPK14	2
BP	GO:0032147	activation of protein kinase activity	3/7	333/18670	0.00018662	0.00266339	0.000771714	MAPK1/EGFR/MAPK14	3
BP	GO:0071902	positive regulation of protein serine/threonine kinase activity	3/7	334/18670	0.000188281	0.00266339	0.000771714	MAPK1/EGFR/MAPK14	3
BP	GO:0042743	hydrogen peroxide metabolic process	2/7	57/18670	0.000190436	0.00266339	0.000771714	EGFR/CAT	2
BP	GO:0060043	regulation of cardiac muscle cell proliferation	2/7	57/18670	0.000190436	0.00266339	0.000771714	MAPK1/MAPK14	2
BP	GO:0043405	regulation of MAP kinase activity	3/7	337/18670	0.000193321	0.00266339	0.000771714	MAPK1/EGFR/MAPK14	3
BP	GO:0071496	cellular response to external stimulus	3/7	339/18670	0.00019673	0.00266339	0.000771714	MAPK1/EGFR/ICAM1	3
BP	GO:0019229	regulation of vasoconstriction	2/7	58/18670	0.000197202	0.00266339	0.000771714	EGFR/ICAM1	2
BP	GO:0031663	lipopolysaccharide-mediated signaling pathway	2/7	58/18670	0.000197202	0.00266339	0.000771714	MAPK1/MAPK14	2
BP	GO:0071385	cellular response to glucocorticoid stimulus	2/7	58/18670	0.000197202	0.00266339	0.000771714	EGFR/ICAM1	2
BP	GO:1904589	regulation of protein import	2/7	58/18670	0.000197202	0.00266339	0.000771714	MAPK1/MAPK14	2
BP	GO:0001101	response to acid chemical	3/7	343/18670	0.000203665	0.0027187	0.000787739	EGFR/ICAM1/CAT	3
BP	GO:0071384	cellular response to corticosteroid stimulus	2/7	61/18670	0.000218201	0.00287554	0.000833184	EGFR/ICAM1	2
BP	GO:0001505	regulation of neurotransmitter levels	3/7	354/18670	0.000223556	0.00287554	0.000833184	IL10/ICAM1/PRKCB	3
BP	GO:0046824	positive regulation of nucleocytoplasmic transport	2/7	62/18670	0.000225434	0.00287554	0.000833184	MAPK1/MAPK14	2
BP	GO:0055025	positive regulation of cardiac muscle tissue development	2/7	62/18670	0.000225434	0.00287554	0.000833184	MAPK1/MAPK14	2
BP	GO:0046622	positive regulation of organ growth	2/7	63/18670	0.000232784	0.00293666	0.000850893	MAPK1/MAPK14	2
BP	GO:0014823	response to activity	2/7	65/18670	0.000247833	0.00305927	0.000886419	IL10/CAT	2
BP	GO:0072577	endothelial cell apoptotic process	2/7	65/18670	0.000247833	0.00305927	0.000886419	IL10/ICAM1	2
BP	GO:0045428	regulation of nitric oxide biosynthetic process	2/7	66/18670	0.000255532	0.00312075	0.000904234	IL10/ICAM1	2
BP	GO:0001701	in utero embryonic development	3/7	373/18670	0.000260826	0.00314919	0.000912475	MAPK1/IL10/EGFR	3
BP	GO:0060038	cardiac muscle cell proliferation	2/7	67/18670	0.000263347	0.00314919	0.000912475	MAPK1/MAPK14	2
BP	GO:0048545	response to steroid hormone	3/7	385/18670	0.00028633	0.00338873	0.000981882	IL10/EGFR/ICAM1	3
BP	GO:0031100	animal organ regeneration	2/7	73/18670	0.00031268	0.00362582	0.00105058	IL10/EGFR	2
BP	GO:1903524	positive regulation of blood circulation	2/7	73/18670	0.00031268	0.00362582	0.00105058	EGFR/ICAM1	2
BP	GO:1903532	positive regulation of secretion by cell	3/7	399/18670	0.000318078	0.00365154	0.00105803	IL10/EGFR/MAPK14	3
BP	GO:1900182	positive regulation of protein localization to nucleus	2/7	74/18670	0.000321308	0.00365209	0.00105819	MAPK1/MAPK14	2
BP	GO:0022407	regulation of cell-cell adhesion	3/7	403/18670	0.000327552	0.00368656	0.00106818	IL10/ICAM1/MAPK14	3
BP	GO:0042310	vasoconstriction	2/7	76/18670	0.000338911	0.00377738	0.00109449	EGFR/ICAM1	2
BP	GO:0006809	nitric oxide biosynthetic process	2/7	77/18670	0.000347887	0.00384013	0.00111267	IL10/ICAM1	2
BP	GO:0010827	regulation of glucose transmembrane transport	2/7	78/18670	0.000356978	0.00386614	0.00112021	MAPK14/PRKCB	2
BP	GO:0055021	regulation of cardiac muscle tissue growth	2/7	78/18670	0.000356978	0.00386614	0.00112021	MAPK1/MAPK14	2
BP	GO:0032386	regulation of intracellular transport	3/7	423/18670	0.000377681	0.00397573	0.00115196	MAPK1/MAPK14/PRKCB	3
BP	GO:0014855	striated muscle cell proliferation	2/7	81/18670	0.000384944	0.00397573	0.00115196	MAPK1/MAPK14	2
BP	GO:0048708	astrocyte differentiation	2/7	81/18670	0.000384944	0.00397573	0.00115196	MAPK1/EGFR	2
BP	GO:0048568	embryonic organ development	3/7	428/18670	0.000390946	0.00397573	0.00115196	MAPK1/IL10/EGFR	3
BP	GO:0051047	positive regulation of secretion	3/7	428/18670	0.000390946	0.00397573	0.00115196	IL10/EGFR/MAPK14	3
BP	GO:0051052	regulation of DNA metabolic process	3/7	429/18670	0.000393635	0.00397573	0.00115196	MAPK1/IL10/EGFR	3
BP	GO:0046209	nitric oxide metabolic process	2/7	82/18670	0.000394497	0.00397573	0.00115196	IL10/ICAM1	2
BP	GO:0048732	gland development	3/7	434/18670	0.000407261	0.00397573	0.00115196	MAPK1/IL10/EGFR	3
BP	GO:0050673	epithelial cell proliferation	3/7	434/18670	0.000407261	0.00397573	0.00115196	MAPK1/IL10/EGFR	3
BP	GO:0050804	modulation of chemical synaptic transmission	3/7	436/18670	0.000412796	0.00397573	0.00115196	MAPK1/EGFR/PRKCB	3
BP	GO:0002718	regulation of cytokine production involved in immune response	2/7	84/18670	0.000413949	0.00397573	0.00115196	IL10/MAPK14	2	immunity
BP	GO:0060420	regulation of heart growth	2/7	84/18670	0.000413949	0.00397573	0.00115196	MAPK1/MAPK14	2
BP	GO:0097756	negative regulation of blood vessel diameter	2/7	84/18670	0.000413949	0.00397573	0.00115196	EGFR/ICAM1	2
BP	GO:0099177	regulation of trans-synaptic signaling	3/7	437/18670	0.000415582	0.00397573	0.00115196	MAPK1/EGFR/PRKCB	3
BP	GO:2001057	reactive nitrogen species metabolic process	2/7	85/18670	0.000423848	0.0040213	0.00116517	IL10/ICAM1	2
BP	GO:0045844	positive regulation of striated muscle tissue development	2/7	87/18670	0.000443991	0.00414392	0.0012007	MAPK1/MAPK14	2
BP	GO:0048636	positive regulation of muscle organ development	2/7	87/18670	0.000443991	0.00414392	0.0012007	MAPK1/MAPK14	2
BP	GO:0032088	negative regulation of NF-kappaB transcription factor activity	2/7	88/18670	0.000454236	0.0041717	0.00120874	IL10/CAT	2
BP	GO:1901863	positive regulation of muscle tissue development	2/7	88/18670	0.000454236	0.0041717	0.00120874	MAPK1/MAPK14	2
BP	GO:0033273	response to vitamin	2/7	93/18670	0.000507179	0.00458458	0.00132838	EGFR/CAT	2
BP	GO:1901655	cellular response to ketone	2/7	93/18670	0.000507179	0.00458458	0.00132838	EGFR/ICAM1	2
BP	GO:0050708	regulation of protein secretion	3/7	472/18670	0.000520932	0.00467211	0.00135374	IL10/EGFR/MAPK14	3
BP	GO:0048010	vascular endothelial growth factor receptor signaling pathway	2/7	96/18670	0.000540322	0.00477146	0.00138252	MAPK14/PRKCB	2
BP	GO:0097327	response to antineoplastic agent	2/7	96/18670	0.000540322	0.00477146	0.00138252	EGFR/ICAM1	2
BP	GO:0043312	neutrophil degranulation	3/7	485/18670	0.00056407	0.0049057	0.00142142	MAPK1/MAPK14/CAT	3
BP	GO:0050727	regulation of inflammatory response	3/7	485/18670	0.00056407	0.0049057	0.00142142	IL10/EGFR/MAPK14	3	inflammatory
BP	GO:0002283	neutrophil activation involved in immune response	3/7	488/18670	0.000574343	0.00495749	0.00143643	MAPK1/MAPK14/CAT	3	immunity
BP	GO:0055024	regulation of cardiac muscle tissue development	2/7	100/18670	0.000586114	0.00502063	0.00145472	MAPK1/MAPK14	2
BP	GO:0048661	positive regulation of smooth muscle cell proliferation	2/7	101/18670	0.000597848	0.00502063	0.00145472	IL10/EGFR	2
BP	GO:1903426	regulation of reactive oxygen species biosynthetic process	2/7	101/18670	0.000597848	0.00502063	0.00145472	IL10/ICAM1	2
BP	GO:0042119	neutrophil activation	3/7	498/18670	0.000609459	0.00502063	0.00145472	MAPK1/MAPK14/CAT	3
BP	GO:0002367	cytokine production involved in immune response	2/7	102/18670	0.000609696	0.00502063	0.00145472	IL10/MAPK14	2	immunity
BP	GO:0002446	neutrophil mediated immunity	3/7	499/18670	0.000613045	0.00502063	0.00145472	MAPK1/MAPK14/CAT	3	immunity
BP	GO:0050900	leukocyte migration	3/7	499/18670	0.000613045	0.00502063	0.00145472	IL10/ICAM1/MAPK14	3
BP	GO:0002791	regulation of peptide secretion	3/7	500/18670	0.000616645	0.00502063	0.00145472	IL10/EGFR/MAPK14	3
BP	GO:0019233	sensory perception of pain	2/7	104/18670	0.000633734	0.0050876	0.00147412	MAPK1/IL10	2
BP	GO:0046822	regulation of nucleocytoplasmic transport	2/7	104/18670	0.000633734	0.0050876	0.00147412	MAPK1/MAPK14	2
BP	GO:0055017	cardiac muscle tissue growth	2/7	105/18670	0.000645924	0.00514945	0.00149205	MAPK1/MAPK14	2
BP	GO:0042136	neurotransmitter biosynthetic process	2/7	106/18670	0.000658228	0.00521135	0.00150998	IL10/ICAM1	2
BP	GO:1904659	glucose transmembrane transport	2/7	108/18670	0.000683177	0.00537183	0.00155648	MAPK14/PRKCB	2
BP	GO:1904019	epithelial cell apoptotic process	2/7	111/18670	0.000721453	0.0056342	0.0016325	IL10/ICAM1	2
BP	GO:0008645	hexose transmembrane transport	2/7	112/18670	0.000734439	0.00565863	0.00163958	MAPK14/PRKCB	2
BP	GO:0060419	heart growth	2/7	112/18670	0.000734439	0.00565863	0.00163958	MAPK1/MAPK14	2
BP	GO:0043200	response to amino acid	2/7	113/18670	0.000747538	0.00568327	0.00164672	EGFR/ICAM1	2
BP	GO:0046620	regulation of organ growth	2/7	113/18670	0.000747538	0.00568327	0.00164672	MAPK1/MAPK14	2
BP	GO:0015749	monosaccharide transmembrane transport	2/7	114/18670	0.000760751	0.00574567	0.0016648	MAPK14/PRKCB	2
BP	GO:0007569	cell aging	2/7	116/18670	0.000787517	0.0058327	0.00169002	ICAM1/MAPK14	2
BP	GO:0034219	carbohydrate transmembrane transport	2/7	116/18670	0.000787517	0.0058327	0.00169002	MAPK14/PRKCB	2
BP	GO:1900180	regulation of protein localization to nucleus	2/7	116/18670	0.000787517	0.0058327	0.00169002	MAPK1/MAPK14	2
BP	GO:0046718	viral entry into host cell	2/7	121/18670	0.00085641	0.0063023	0.00182608	EGFR/ICAM1	2
BP	GO:1903409	reactive oxygen species biosynthetic process	2/7	122/18670	0.000870528	0.00636539	0.00184436	IL10/ICAM1	2
BP	GO:0045471	response to ethanol	2/7	125/18670	0.000913558	0.00663775	0.00192328	ICAM1/CAT	2
BP	GO:0018107	peptidyl-threonine phosphorylation	2/7	126/18670	0.000928127	0.00670119	0.00194166	MAPK1/PRKCB	2
BP	GO:0002687	positive regulation of leukocyte migration	2/7	128/18670	0.000957602	0.00687079	0.0019908	ICAM1/MAPK14	2
BP	GO:0050853	B cell receptor signaling pathway	2/7	129/18670	0.000972508	0.00693441	0.00200924	MAPK1/PRKCB	2
BP	GO:0042177	negative regulation of protein catabolic process	2/7	132/18670	0.0010179	0.00720919	0.00208886	IL10/EGFR	2
BP	GO:0018210	peptidyl-threonine modification	2/7	134/18670	0.00104872	0.00720919	0.00208886	MAPK1/PRKCB	2
BP	GO:0030260	entry into host cell	2/7	134/18670	0.00104872	0.00720919	0.00208886	EGFR/ICAM1	2
BP	GO:0044409	entry into host	2/7	134/18670	0.00104872	0.00720919	0.00208886	EGFR/ICAM1	2
BP	GO:0051806	entry into cell of other organism involved in symbiotic interaction	2/7	134/18670	0.00104872	0.00720919	0.00208886	EGFR/ICAM1	2
BP	GO:0051828	entry into other organism involved in symbiotic interaction	2/7	134/18670	0.00104872	0.00720919	0.00208886	EGFR/ICAM1	2
BP	GO:0001889	liver development	2/7	135/18670	0.0010643	0.00727274	0.00210727	IL10/EGFR	2
BP	GO:0061008	hepaticobiliary system development	2/7	138/18670	0.00111172	0.00755177	0.00218812	IL10/EGFR	2
BP	GO:0002700	regulation of production of molecular mediator of immune response	2/7	139/18670	0.00112774	0.00757105	0.0021937	IL10/MAPK14	2	immunity
BP	GO:0050715	positive regulation of cytokine secretion	2/7	139/18670	0.00112774	0.00757105	0.0021937	IL10/MAPK14	2	cytokine
BP	GO:0009411	response to UV	2/7	141/18670	0.00116013	0.00773746	0.00224192	EGFR/CAT	2
BP	GO:0038127	ERBB signaling pathway	2/7	142/18670	0.0011765	0.00773746	0.00224192	MAPK1/EGFR	2
BP	GO:0006606	protein import into nucleus	2/7	143/18670	0.00119297	0.00773746	0.00224192	MAPK1/MAPK14	2
BP	GO:0035296	regulation of tube diameter	2/7	143/18670	0.00119297	0.00773746	0.00224192	EGFR/ICAM1	2
BP	GO:0050880	regulation of blood vessel size	2/7	143/18670	0.00119297	0.00773746	0.00224192	EGFR/ICAM1	2
BP	GO:0097746	regulation of blood vessel diameter	2/7	143/18670	0.00119297	0.00773746	0.00224192	EGFR/ICAM1	2
BP	GO:0035150	regulation of tube size	2/7	144/18670	0.00120956	0.00775738	0.00224769	EGFR/ICAM1	2
BP	GO:0071322	cellular response to carbohydrate stimulus	2/7	144/18670	0.00120956	0.00775738	0.00224769	ICAM1/PRKCB	2
BP	GO:0042542	response to hydrogen peroxide	2/7	146/18670	0.00124306	0.00792797	0.00229712	IL10/CAT	2
BP	GO:0010212	response to ionizing radiation	2/7	147/18670	0.00125998	0.00799149	0.00231552	ICAM1/MAPK14	2
BP	GO:0008643	carbohydrate transport	2/7	148/18670	0.00127701	0.00805501	0.00233393	MAPK14/PRKCB	2
BP	GO:0016999	antibiotic metabolic process	2/7	151/18670	0.00132877	0.00832812	0.00241306	EGFR/CAT	2
BP	GO:0000187	activation of MAPK activity	2/7	152/18670	0.00134625	0.00832812	0.00241306	MAPK1/MAPK14	2
BP	GO:0016202	regulation of striated muscle tissue development	2/7	152/18670	0.00134625	0.00832812	0.00241306	MAPK1/MAPK14	2
BP	GO:0030168	platelet activation	2/7	153/18670	0.00136384	0.00832812	0.00241306	MAPK1/PRKCB	2
BP	GO:0042133	neurotransmitter metabolic process	2/7	153/18670	0.00136384	0.00832812	0.00241306	IL10/ICAM1	2
BP	GO:0090316	positive regulation of intracellular protein transport	2/7	153/18670	0.00136384	0.00832812	0.00241306	MAPK1/MAPK14	2
BP	GO:1901861	regulation of muscle tissue development	2/7	155/18670	0.00139934	0.00849972	0.00246278	MAPK1/MAPK14	2
BP	GO:0048634	regulation of muscle organ development	2/7	156/18670	0.00141726	0.00856326	0.00248119	MAPK1/MAPK14	2
BP	GO:0051170	import into nucleus	2/7	163/18670	0.0015458	0.00929097	0.00269205	MAPK1/MAPK14	2
BP	GO:0035051	cardiocyte differentiation	2/7	167/18670	0.00162167	0.00969626	0.00280948	MAPK1/EGFR	2
BP	GO:0050806	positive regulation of synaptic transmission	2/7	168/18670	0.00164092	0.00976049	0.00282809	MAPK1/EGFR	2
BP	GO:0048660	regulation of smooth muscle cell proliferation	2/7	169/18670	0.00166027	0.0098247	0.0028467	IL10/EGFR	2
BP	GO:0043433	negative regulation of DNA-binding transcription factor activity	2/7	170/18670	0.00167974	0.00988891	0.0028653	IL10/CAT	2
BP	GO:0048659	smooth muscle cell proliferation	2/7	171/18670	0.00169931	0.00995311	0.0028839	IL10/EGFR	2
BP	GO:0030324	lung development	2/7	172/18670	0.00171899	0.0100173	0.0029025	MAPK1/EGFR	2
BP	GO:0003018	vascular process in circulatory system	2/7	173/18670	0.00173879	0.0100815	0.00292109	EGFR/ICAM1	2
BP	GO:0030323	respiratory tube development	2/7	176/18670	0.00179883	0.0103772	0.00300677	MAPK1/EGFR	2
BP	GO:0071466	cellular response to xenobiotic stimulus	2/7	180/18670	0.00188041	0.0107936	0.00312742	EGFR/ICAM1	2
BP	GO:0002285	lymphocyte activation involved in immune response	2/7	181/18670	0.00190108	0.0108579	0.00314607	IL10/ICAM1	2	immunity
BP	GO:0048639	positive regulation of developmental growth	2/7	184/18670	0.00196375	0.0111603	0.00323368	MAPK1/MAPK14	2
BP	GO:0071248	cellular response to metal ion	2/7	190/18670	0.00209202	0.0118307	0.00342793	MAPK1/EGFR	2
BP	GO:1901654	response to ketone	2/7	193/18670	0.00215762	0.0121419	0.0035181	EGFR/ICAM1	2
BP	GO:0002685	regulation of leukocyte migration	2/7	196/18670	0.0022242	0.0124555	0.00360897	ICAM1/MAPK14	2
BP	GO:0031099	regeneration	2/7	198/18670	0.00226913	0.0125843	0.00364629	IL10/EGFR	2
BP	GO:0060541	respiratory system development	2/7	198/18670	0.00226913	0.0125843	0.00364629	MAPK1/EGFR	2
BP	GO:0017038	protein import	2/7	199/18670	0.00229175	0.0126487	0.00366495	MAPK1/MAPK14	2
BP	GO:0030278	regulation of ossification	2/7	203/18670	0.00238334	0.0130912	0.00379317	MAPK1/MAPK14	2
BP	GO:0035265	organ growth	2/7	204/18670	0.0024065	0.0130932	0.00379374	MAPK1/MAPK14	2
BP	GO:0045766	positive regulation of angiogenesis	2/7	204/18670	0.0024065	0.0130932	0.00379374	IL10/PRKCB	2
BP	GO:0050679	positive regulation of epithelial cell proliferation	2/7	206/18670	0.00245316	0.0132841	0.00384905	IL10/EGFR	2
BP	GO:0034284	response to monosaccharide	2/7	207/18670	0.00247665	0.0133483	0.00386766	ICAM1/CAT	2
BP	GO:0051701	interaction with host	2/7	209/18670	0.00252395	0.0135397	0.00392311	EGFR/ICAM1	2
BP	GO:0009612	response to mechanical stimulus	2/7	210/18670	0.00254776	0.0135409	0.00392345	EGFR/MAPK14	2
BP	GO:0050707	regulation of cytokine secretion	2/7	210/18670	0.00254776	0.0135409	0.00392345	IL10/MAPK14	2	cytokine
BP	GO:0032388	positive regulation of intracellular transport	2/7	215/18670	0.00266843	0.0140521	0.00407158	MAPK1/MAPK14	2
BP	GO:0070374	positive regulation of ERK1 and ERK2 cascade	2/7	215/18670	0.00266843	0.0140521	0.00407158	EGFR/ICAM1	2
BP	GO:0071241	cellular response to inorganic substance	2/7	217/18670	0.00271745	0.0142441	0.00412722	MAPK1/EGFR	2
BP	GO:0010001	glial cell differentiation	2/7	218/18670	0.00274212	0.0142441	0.00412722	MAPK1/EGFR	2
BP	GO:0050807	regulation of synapse organization	2/7	218/18670	0.00274212	0.0142441	0.00412722	IL10/MAPK14	2
BP	GO:0007584	response to nutrient	2/7	219/18670	0.0027669	0.0143081	0.00414575	EGFR/CAT	2
BP	GO:0030595	leukocyte chemotaxis	2/7	224/18670	0.00289238	0.0148899	0.00431434	IL10/MAPK14	2
BP	GO:0033157	regulation of intracellular protein transport	2/7	225/18670	0.0029178	0.0149537	0.00433283	MAPK1/MAPK14	2
BP	GO:0050803	regulation of synapse structure or activity	2/7	227/18670	0.00296896	0.0151483	0.0043892	IL10/MAPK14	2
BP	GO:0051054	positive regulation of DNA metabolic process	2/7	228/18670	0.00299469	0.015212	0.00440765	MAPK1/EGFR	2
BP	GO:1904018	positive regulation of vasculature development	2/7	230/18670	0.00304649	0.0154069	0.00446413	IL10/PRKCB	2
BP	GO:0048738	cardiac muscle tissue development	2/7	233/18670	0.00312497	0.0156658	0.00453915	MAPK1/MAPK14	2
BP	GO:0097305	response to alcohol	2/7	233/18670	0.00312497	0.0156658	0.00453915	ICAM1/CAT	2
BP	GO:0031669	cellular response to nutrient levels	2/7	237/18670	0.00323111	0.0160576	0.00465268	MAPK1/ICAM1	2
BP	GO:0032872	regulation of stress-activated MAPK cascade	2/7	237/18670	0.00323111	0.0160576	0.00465268	MAPK1/EGFR	2
BP	GO:0070302	regulation of stress-activated protein kinase signaling cascade	2/7	239/18670	0.00328481	0.0162541	0.00470962	MAPK1/EGFR	2
BP	GO:0050663	cytokine secretion	2/7	240/18670	0.00331182	0.0163175	0.00472796	IL10/MAPK14	2	cytokine
BP	GO:0097237	cellular response to toxic substance	2/7	247/18670	0.00350384	0.0170535	0.00494122	IL10/CAT	2
BP	GO:0071383	cellular response to steroid hormone stimulus	2/7	250/18670	0.00358771	0.0170535	0.00494122	EGFR/ICAM1	2
BP	GO:0045637	regulation of myeloid cell differentiation	2/7	251/18670	0.00361588	0.0170535	0.00494122	MAPK14/PRKCB	2
BP	GO:0022409	positive regulation of cell-cell adhesion	2/7	255/18670	0.00372961	0.0170535	0.00494122	IL10/ICAM1	2
BP	GO:0002291	T cell activation via T cell receptor contact with antigen bound to MHC molecule on antigen presenting cell	1/7	10/18670	0.00374391	0.0170535	0.00494122	ICAM1	1
BP	GO:0010749	regulation of nitric oxide mediated signal transduction	1/7	10/18670	0.00374391	0.0170535	0.00494122	EGFR	1
BP	GO:0019062	virion attachment to host cell	1/7	10/18670	0.00374391	0.0170535	0.00494122	ICAM1	1
BP	GO:0032621	interleukin-18 production	1/7	10/18670	0.00374391	0.0170535	0.00494122	IL10	1
BP	GO:0042536	negative regulation of tumor necrosis factor biosynthetic process	1/7	10/18670	0.00374391	0.0170535	0.00494122	IL10	1
BP	GO:0045348	positive regulation of MHC class II biosynthetic process	1/7	10/18670	0.00374391	0.0170535	0.00494122	IL10	1
BP	GO:0050861	positive regulation of B cell receptor signaling pathway	1/7	10/18670	0.00374391	0.0170535	0.00494122	PRKCB	1
BP	GO:0070391	response to lipoteichoic acid	1/7	10/18670	0.00374391	0.0170535	0.00494122	MAPK14	1
BP	GO:0071223	cellular response to lipoteichoic acid	1/7	10/18670	0.00374391	0.0170535	0.00494122	MAPK14	1
BP	GO:0071609	chemokine (C-C motif) ligand 5 production	1/7	10/18670	0.00374391	0.0170535	0.00494122	IL10	1
BP	GO:0072610	interleukin-12 secretion	1/7	10/18670	0.00374391	0.0170535	0.00494122	MAPK14	1
BP	GO:0090336	positive regulation of brown fat cell differentiation	1/7	10/18670	0.00374391	0.0170535	0.00494122	MAPK14	1
BP	GO:0090557	establishment of endothelial intestinal barrier	1/7	10/18670	0.00374391	0.0170535	0.00494122	ICAM1	1
BP	GO:1903800	positive regulation of production of miRNAs involved in gene silencing by miRNA	1/7	10/18670	0.00374391	0.0170535	0.00494122	EGFR	1
BP	GO:0007611	learning or memory	2/7	256/18670	0.0037583	0.0170535	0.00494122	MAPK1/EGFR	2
BP	GO:0050730	regulation of peptidyl-tyrosine phosphorylation	2/7	256/18670	0.0037583	0.0170535	0.00494122	EGFR/ICAM1	2
BP	GO:0034504	protein localization to nucleus	2/7	262/18670	0.00393265	0.0177743	0.00515009	MAPK1/MAPK14	2
BP	GO:0031330	negative regulation of cellular catabolic process	2/7	264/18670	0.0039916	0.0179055	0.0051881	IL10/MAPK14	2
BP	GO:0031668	cellular response to extracellular stimulus	2/7	268/18670	0.00411076	0.0179055	0.0051881	MAPK1/ICAM1	2
BP	GO:0034115	negative regulation of heterotypic cell-cell adhesion	1/7	11/18670	0.00411764	0.0179055	0.0051881	IL10	1
BP	GO:0045351	type I interferon biosynthetic process	1/7	11/18670	0.00411764	0.0179055	0.0051881	IL10	1
BP	GO:0060439	trachea morphogenesis	1/7	11/18670	0.00411764	0.0179055	0.0051881	MAPK1	1
BP	GO:0061307	cardiac neural crest cell differentiation involved in heart development	1/7	11/18670	0.00411764	0.0179055	0.0051881	MAPK1	1
BP	GO:0061308	cardiac neural crest cell development involved in heart development	1/7	11/18670	0.00411764	0.0179055	0.0051881	MAPK1	1
BP	GO:0070587	regulation of cell-cell adhesion involved in gastrulation	1/7	11/18670	0.00411764	0.0179055	0.0051881	IL10	1
BP	GO:0072584	caveolin-mediated endocytosis	1/7	11/18670	0.00411764	0.0179055	0.0051881	MAPK1	1
BP	GO:0072683	T cell extravasation	1/7	11/18670	0.00411764	0.0179055	0.0051881	ICAM1	1
BP	GO:0002862	negative regulation of inflammatory response to antigenic stimulus	1/7	12/18670	0.00449125	0.0188863	0.00547228	IL10	1	inflammatory
BP	GO:0007077	mitotic nuclear envelope disassembly	1/7	12/18670	0.00449125	0.0188863	0.00547228	PRKCB	1
BP	GO:0009642	response to light intensity	1/7	12/18670	0.00449125	0.0188863	0.00547228	CAT	1
BP	GO:0010960	magnesium ion homeostasis	1/7	12/18670	0.00449125	0.0188863	0.00547228	EGFR	1
BP	GO:0032429	regulation of phospholipase A2 activity	1/7	12/18670	0.00449125	0.0188863	0.00547228	EGFR	1
BP	GO:0033197	response to vitamin E	1/7	12/18670	0.00449125	0.0188863	0.00547228	CAT	1
BP	GO:0044650	adhesion of symbiont to host cell	1/7	12/18670	0.00449125	0.0188863	0.00547228	ICAM1	1
BP	GO:0060670	branching involved in labyrinthine layer morphogenesis	1/7	12/18670	0.00449125	0.0188863	0.00547228	IL10	1
BP	GO:0070586	cell-cell adhesion involved in gastrulation	1/7	12/18670	0.00449125	0.0188863	0.00547228	IL10	1
BP	GO:0002440	production of molecular mediator of immune response	2/7	286/18670	0.0046675	0.0194847	0.00564567	IL10/MAPK14	2	immunity
BP	GO:0060828	regulation of canonical Wnt signaling pathway	2/7	286/18670	0.0046675	0.0194847	0.00564567	EGFR/MAPK14	2
BP	GO:0042063	gliogenesis	2/7	290/18670	0.00479576	0.0199454	0.00577916	MAPK1/EGFR	2
BP	GO:0009410	response to xenobiotic stimulus	2/7	292/18670	0.00486051	0.0199454	0.00577916	EGFR/ICAM1	2
BP	GO:0007494	midgut development	1/7	13/18670	0.00486474	0.0199454	0.00577916	EGFR	1
BP	GO:0009650	UV protection	1/7	13/18670	0.00486474	0.0199454	0.00577916	CAT	1
BP	GO:0061029	eyelid development in camera-type eye	1/7	13/18670	0.00486474	0.0199454	0.00577916	EGFR	1
BP	GO:0050890	cognition	2/7	296/18670	0.00499123	0.0203912	0.00590833	MAPK1/EGFR	2
BP	GO:1903522	regulation of blood circulation	2/7	297/18670	0.00502417	0.020453	0.00592623	EGFR/ICAM1	2
BP	GO:0070372	regulation of ERK1 and ERK2 cascade	2/7	300/18670	0.00512359	0.0205296	0.00594843	EGFR/ICAM1	2
BP	GO:0020027	hemoglobin metabolic process	1/7	14/18670	0.00523811	0.0205296	0.00594843	CAT	1
BP	GO:0045346	regulation of MHC class II biosynthetic process	1/7	14/18670	0.00523811	0.0205296	0.00594843	IL10	1
BP	GO:0048308	organelle inheritance	1/7	14/18670	0.00523811	0.0205296	0.00594843	MAPK1	1
BP	GO:0048313	Golgi inheritance	1/7	14/18670	0.00523811	0.0205296	0.00594843	MAPK1	1
BP	GO:0060009	Sertoli cell development	1/7	14/18670	0.00523811	0.0205296	0.00594843	ICAM1	1
BP	GO:0099171	presynaptic modulation of chemical synaptic transmission	1/7	14/18670	0.00523811	0.0205296	0.00594843	PRKCB	1
BP	GO:1900121	negative regulation of receptor binding	1/7	14/18670	0.00523811	0.0205296	0.00594843	IL10	1
BP	GO:1903351	cellular response to dopamine	1/7	14/18670	0.00523811	0.0205296	0.00594843	MAPK1	1
BP	GO:1905050	positive regulation of metallopeptidase activity	1/7	14/18670	0.00523811	0.0205296	0.00594843	MAPK14	1
BP	GO:0060326	cell chemotaxis	2/7	304/18670	0.00525759	0.0205296	0.00594843	IL10/MAPK14	2
BP	GO:1903037	regulation of leukocyte cell-cell adhesion	2/7	304/18670	0.00525759	0.0205296	0.00594843	IL10/ICAM1	2
BP	GO:0042113	B cell activation	2/7	310/18670	0.00546163	0.0212541	0.00615835	IL10/PRKCB	2
BP	GO:0009416	response to light stimulus	2/7	314/18670	0.0055997	0.0214015	0.00620105	EGFR/CAT	2
BP	GO:0010759	positive regulation of macrophage chemotaxis	1/7	15/18670	0.00561136	0.0214015	0.00620105	MAPK14	1
BP	GO:0044406	adhesion of symbiont to host	1/7	15/18670	0.00561136	0.0214015	0.00620105	ICAM1	1
BP	GO:0045342	MHC class II biosynthetic process	1/7	15/18670	0.00561136	0.0214015	0.00620105	IL10	1
BP	GO:1903350	response to dopamine	1/7	15/18670	0.00561136	0.0214015	0.00620105	MAPK1	1
BP	GO:1903358	regulation of Golgi organization	1/7	15/18670	0.00561136	0.0214015	0.00620105	MAPK1	1
BP	GO:0050851	antigen receptor-mediated signaling pathway	2/7	316/18670	0.00566934	0.021551	0.00624437	MAPK1/PRKCB	2
BP	GO:0032103	positive regulation of response to external stimulus	2/7	323/18670	0.00591626	0.0221619	0.00642138	EGFR/MAPK14	2
BP	GO:0006206	pyrimidine nucleobase metabolic process	1/7	16/18670	0.00598449	0.0221619	0.00642138	MAPK1	1
BP	GO:0030397	membrane disassembly	1/7	16/18670	0.00598449	0.0221619	0.00642138	PRKCB	1
BP	GO:0030889	negative regulation of B cell proliferation	1/7	16/18670	0.00598449	0.0221619	0.00642138	IL10	1
BP	GO:0032695	negative regulation of interleukin-12 production	1/7	16/18670	0.00598449	0.0221619	0.00642138	IL10	1
BP	GO:0034116	positive regulation of heterotypic cell-cell adhesion	1/7	16/18670	0.00598449	0.0221619	0.00642138	IL10	1
BP	GO:0051081	nuclear envelope disassembly	1/7	16/18670	0.00598449	0.0221619	0.00642138	PRKCB	1
BP	GO:0090335	regulation of brown fat cell differentiation	1/7	16/18670	0.00598449	0.0221619	0.00642138	MAPK14	1
BP	GO:0019058	viral life cycle	2/7	328/18670	0.00609565	0.022501	0.00651964	EGFR/ICAM1	2
BP	GO:0071214	cellular response to abiotic stimulus	2/7	331/18670	0.0062045	0.0226659	0.0065674	EGFR/MAPK14	2
BP	GO:0104004	cellular response to environmental stimulus	2/7	331/18670	0.0062045	0.0226659	0.0065674	EGFR/MAPK14	2
BP	GO:0060070	canonical Wnt signaling pathway	2/7	335/18670	0.00635103	0.0226659	0.0065674	EGFR/MAPK14	2
BP	GO:0002693	positive regulation of cellular extravasation	1/7	17/18670	0.0063575	0.0226659	0.0065674	ICAM1	1
BP	GO:0035729	cellular response to hepatocyte growth factor stimulus	1/7	17/18670	0.0063575	0.0226659	0.0065674	IL10	1
BP	GO:0042953	lipoprotein transport	1/7	17/18670	0.0063575	0.0226659	0.0065674	PRKCB	1
BP	GO:0042994	cytoplasmic sequestering of transcription factor	1/7	17/18670	0.0063575	0.0226659	0.0065674	IL10	1
BP	GO:0044872	lipoprotein localization	1/7	17/18670	0.0063575	0.0226659	0.0065674	PRKCB	1
BP	GO:1904355	positive regulation of telomere capping	1/7	17/18670	0.0063575	0.0226659	0.0065674	MAPK1	1
BP	GO:1904996	positive regulation of leukocyte adhesion to vascular endothelial cell	1/7	17/18670	0.0063575	0.0226659	0.0065674	ICAM1	1
BP	GO:2000641	regulation of early endosome to late endosome transport	1/7	17/18670	0.0063575	0.0226659	0.0065674	MAPK1	1
BP	GO:0007596	blood coagulation	2/7	336/18670	0.00638791	0.0227038	0.00657839	MAPK1/PRKCB	2
BP	GO:0007159	leukocyte cell-cell adhesion	2/7	337/18670	0.00642489	0.0227647	0.00659606	IL10/ICAM1	2
BP	GO:0045930	negative regulation of mitotic cell cycle	2/7	338/18670	0.00646198	0.0228257	0.00661371	IL10/EGFR	2
BP	GO:0007599	hemostasis	2/7	341/18670	0.00657382	0.0231495	0.00670755	MAPK1/PRKCB	2
BP	GO:0050817	coagulation	2/7	342/18670	0.0066113	0.0232026	0.00672294	MAPK1/PRKCB	2
BP	GO:0006913	nucleocytoplasmic transport	2/7	343/18670	0.00664889	0.0232026	0.00672294	MAPK1/MAPK14	2
BP	GO:0002902	regulation of B cell apoptotic process	1/7	18/18670	0.00673038	0.0232026	0.00672294	IL10	1
BP	GO:0035994	response to muscle stretch	1/7	18/18670	0.00673038	0.0232026	0.00672294	MAPK14	1
BP	GO:0045780	positive regulation of bone resorption	1/7	18/18670	0.00673038	0.0232026	0.00672294	EGFR	1
BP	GO:0046852	positive regulation of bone remodeling	1/7	18/18670	0.00673038	0.0232026	0.00672294	EGFR	1
BP	GO:0070230	positive regulation of lymphocyte apoptotic process	1/7	18/18670	0.00673038	0.0232026	0.00672294	IL10	1
BP	GO:0051169	nuclear transport	2/7	346/18670	0.00676223	0.0232426	0.00673452	MAPK1/MAPK14	2
BP	GO:0048638	regulation of developmental growth	2/7	347/18670	0.00680021	0.0233034	0.00675213	MAPK1/MAPK14	2
BP	GO:0002449	lymphocyte mediated immunity	2/7	352/18670	0.00699159	0.023636	0.0068485	IL10/ICAM1	2	immunity
BP	GO:0002544	chronic inflammatory response	1/7	19/18670	0.00710315	0.023636	0.0068485	IL10	1	inflammatory
BP	GO:0030949	positive regulation of vascular endothelial growth factor receptor signaling pathway	1/7	19/18670	0.00710315	0.023636	0.0068485	PRKCB	1
BP	GO:0032930	positive regulation of superoxide anion generation	1/7	19/18670	0.00710315	0.023636	0.0068485	EGFR	1
BP	GO:0033189	response to vitamin A	1/7	19/18670	0.00710315	0.023636	0.0068485	CAT	1
BP	GO:0035728	response to hepatocyte growth factor	1/7	19/18670	0.00710315	0.023636	0.0068485	IL10	1
BP	GO:0060438	trachea development	1/7	19/18670	0.00710315	0.023636	0.0068485	MAPK1	1
BP	GO:0060716	labyrinthine layer blood vessel development	1/7	19/18670	0.00710315	0.023636	0.0068485	MAPK1	1
BP	GO:1901741	positive regulation of myoblast fusion	1/7	19/18670	0.00710315	0.023636	0.0068485	MAPK14	1
BP	GO:1903798	regulation of production of miRNAs involved in gene silencing by miRNA	1/7	19/18670	0.00710315	0.023636	0.0068485	EGFR	1
BP	GO:0001666	response to hypoxia	2/7	359/18670	0.0072637	0.0240398	0.00696551	ICAM1/CAT	2
BP	GO:0002460	adaptive immune response based on somatic recombination of immune receptors built from immunoglobulin superfamily domains	2/7	361/18670	0.00734233	0.0240398	0.00696551	IL10/ICAM1	2	immunity
BP	GO:0018108	peptidyl-tyrosine phosphorylation	2/7	363/18670	0.00742135	0.0240398	0.00696551	EGFR/ICAM1	2
BP	GO:0030111	regulation of Wnt signaling pathway	2/7	363/18670	0.00742135	0.0240398	0.00696551	EGFR/MAPK14	2
BP	GO:0001502	cartilage condensation	1/7	20/18670	0.0074758	0.0240398	0.00696551	MAPK14	1
BP	GO:0032495	response to muramyl dipeptide	1/7	20/18670	0.0074758	0.0240398	0.00696551	MAPK14	1
BP	GO:0043586	tongue development	1/7	20/18670	0.0074758	0.0240398	0.00696551	EGFR	1
BP	GO:0045019	negative regulation of nitric oxide biosynthetic process	1/7	20/18670	0.0074758	0.0240398	0.00696551	IL10	1
BP	GO:0060008	Sertoli cell differentiation	1/7	20/18670	0.0074758	0.0240398	0.00696551	ICAM1	1
BP	GO:1903204	negative regulation of oxidative stress-induced neuron death	1/7	20/18670	0.0074758	0.0240398	0.00696551	IL10	1
BP	GO:1904406	negative regulation of nitric oxide metabolic process	1/7	20/18670	0.0074758	0.0240398	0.00696551	IL10	1
BP	GO:1905523	positive regulation of macrophage migration	1/7	20/18670	0.0074758	0.0240398	0.00696551	MAPK14	1
BP	GO:0018212	peptidyl-tyrosine modification	2/7	366/18670	0.00754063	0.0241806	0.00700629	EGFR/ICAM1	2
BP	GO:0036293	response to decreased oxygen levels	2/7	370/18670	0.00770105	0.0245501	0.00711336	ICAM1/CAT	2
BP	GO:0002438	acute inflammatory response to antigenic stimulus	1/7	21/18670	0.00784833	0.0245501	0.00711336	ICAM1	1	inflammatory
BP	GO:0010829	negative regulation of glucose transmembrane transport	1/7	21/18670	0.00784833	0.0245501	0.00711336	PRKCB	1
BP	GO:0032682	negative regulation of chemokine production	1/7	21/18670	0.00784833	0.0245501	0.00711336	IL10	1
BP	GO:0055093	response to hyperoxia	1/7	21/18670	0.00784833	0.0245501	0.00711336	CAT	1
BP	GO:0060713	labyrinthine layer morphogenesis	1/7	21/18670	0.00784833	0.0245501	0.00711336	IL10	1
BP	GO:0070920	regulation of production of small RNA involved in gene silencing by RNA	1/7	21/18670	0.00784833	0.0245501	0.00711336	EGFR	1
BP	GO:0098743	cell aggregation	1/7	21/18670	0.00784833	0.0245501	0.00711336	MAPK14	1
BP	GO:1901739	regulation of myoblast fusion	1/7	21/18670	0.00784833	0.0245501	0.00711336	MAPK14	1
BP	GO:0050678	regulation of epithelial cell proliferation	2/7	378/18670	0.00802658	0.0250394	0.00725514	IL10/EGFR	2
BP	GO:0042176	regulation of protein catabolic process	2/7	381/18670	0.00815026	0.0252046	0.007303	IL10/EGFR	2
BP	GO:0030878	thyroid gland development	1/7	22/18670	0.00822074	0.0252046	0.007303	MAPK1	1
BP	GO:0031281	positive regulation of cyclase activity	1/7	22/18670	0.00822074	0.0252046	0.007303	MAPK14	1
BP	GO:0032928	regulation of superoxide anion generation	1/7	22/18670	0.00822074	0.0252046	0.007303	EGFR	1
BP	GO:0045663	positive regulation of myoblast differentiation	1/7	22/18670	0.00822074	0.0252046	0.007303	MAPK14	1
BP	GO:0070935	3'-UTR-mediated mRNA stabilization	1/7	22/18670	0.00822074	0.0252046	0.007303	MAPK14	1
BP	GO:0045765	regulation of angiogenesis	2/7	383/18670	0.00823321	0.0252046	0.007303	IL10/PRKCB	2
BP	GO:1901653	cellular response to peptide	2/7	385/18670	0.00831654	0.025392	0.0073573	ICAM1/PRKCB	2
BP	GO:0045787	positive regulation of cell cycle	2/7	389/18670	0.00848437	0.0256896	0.00744352	IL10/EGFR	2
BP	GO:0014706	striated muscle tissue development	2/7	390/18670	0.00852657	0.0256896	0.00744352	MAPK1/MAPK14	2
BP	GO:0032717	negative regulation of interleukin-8 production	1/7	23/18670	0.00859303	0.0256896	0.00744352	IL10	1
BP	GO:0051043	regulation of membrane protein ectodomain proteolysis	1/7	23/18670	0.00859303	0.0256896	0.00744352	IL10	1
BP	GO:1901032	negative regulation of response to reactive oxygen species	1/7	23/18670	0.00859303	0.0256896	0.00744352	IL10	1
BP	GO:1903206	negative regulation of hydrogen peroxide-induced cell death	1/7	23/18670	0.00859303	0.0256896	0.00744352	IL10	1
BP	GO:2000637	positive regulation of gene silencing by miRNA	1/7	23/18670	0.00859303	0.0256896	0.00744352	EGFR	1
BP	GO:2001039	negative regulation of cellular response to drug	1/7	23/18670	0.00859303	0.0256896	0.00744352	IL10	1
BP	GO:0070482	response to oxygen levels	2/7	394/18670	0.00869635	0.0259309	0.00751345	ICAM1/CAT	2
BP	GO:0001783	B cell apoptotic process	1/7	24/18670	0.0089652	0.026122	0.0075688	IL10	1
BP	GO:0002861	regulation of inflammatory response to antigenic stimulus	1/7	24/18670	0.0089652	0.026122	0.0075688	IL10	1	inflammatory
BP	GO:0010288	response to lead ion	1/7	24/18670	0.0089652	0.026122	0.0075688	CAT	1
BP	GO:0042832	defense response to protozoan	1/7	24/18670	0.0089652	0.026122	0.0075688	IL10	1
BP	GO:0046697	decidualization	1/7	24/18670	0.0089652	0.026122	0.0075688	MAPK1	1
BP	GO:0050857	positive regulation of antigen receptor-mediated signaling pathway	1/7	24/18670	0.0089652	0.026122	0.0075688	PRKCB	1
BP	GO:0051220	cytoplasmic sequestering of protein	1/7	24/18670	0.0089652	0.026122	0.0075688	IL10	1
BP	GO:0060148	positive regulation of posttranscriptional gene silencing	1/7	24/18670	0.0089652	0.026122	0.0075688	EGFR	1
BP	GO:1903649	regulation of cytoplasmic transport	1/7	24/18670	0.0089652	0.026122	0.0075688	MAPK1	1
BP	GO:0045785	positive regulation of cell adhesion	2/7	403/18670	0.00908398	0.026401	0.00764967	IL10/ICAM1	2
BP	GO:0050808	synapse organization	2/7	408/18670	0.0093027	0.0267979	0.00776466	IL10/MAPK14	2
BP	GO:0060537	muscle tissue development	2/7	408/18670	0.0093027	0.0267979	0.00776466	MAPK1/MAPK14	2
BP	GO:0001562	response to protozoan	1/7	25/18670	0.00933725	0.0267979	0.00776466	IL10	1
BP	GO:0002719	negative regulation of cytokine production involved in immune response	1/7	25/18670	0.00933725	0.0267979	0.00776466	IL10	1	immunity
BP	GO:0060571	morphogenesis of an epithelial fold	1/7	25/18670	0.00933725	0.0267979	0.00776466	EGFR	1
BP	GO:0007517	muscle organ development	2/7	410/18670	0.00939087	0.0268846	0.00778977	MAPK1/MAPK14	2
BP	GO:0030099	myeloid cell differentiation	2/7	416/18670	0.00965764	0.0270537	0.00783879	MAPK14/PRKCB	2
BP	GO:0010758	regulation of macrophage chemotaxis	1/7	26/18670	0.00970918	0.0270537	0.00783879	MAPK14	1
BP	GO:0031645	negative regulation of neurological system process	1/7	26/18670	0.00970918	0.0270537	0.00783879	IL10	1
BP	GO:0032800	receptor biosynthetic process	1/7	26/18670	0.00970918	0.0270537	0.00783879	IL10	1
BP	GO:0034114	regulation of heterotypic cell-cell adhesion	1/7	26/18670	0.00970918	0.0270537	0.00783879	IL10	1
BP	GO:0060669	embryonic placenta morphogenesis	1/7	26/18670	0.00970918	0.0270537	0.00783879	IL10	1
BP	GO:0099560	synaptic membrane adhesion	1/7	26/18670	0.00970918	0.0270537	0.00783879	MAPK14	1
BP	GO:1900120	regulation of receptor binding	1/7	26/18670	0.00970918	0.0270537	0.00783879	IL10	1
BP	GO:1903203	regulation of oxidative stress-induced neuron death	1/7	26/18670	0.00970918	0.0270537	0.00783879	IL10	1
BP	GO:1904353	regulation of telomere capping	1/7	26/18670	0.00970918	0.0270537	0.00783879	MAPK1	1
BP	GO:1905048	regulation of metallopeptidase activity	1/7	26/18670	0.00970918	0.0270537	0.00783879	MAPK14	1
BP	GO:1901342	regulation of vasculature development	2/7	422/18670	0.00992786	0.0275961	0.00799593	IL10/PRKCB	2
BP	GO:0036475	neuron death in response to oxidative stress	1/7	27/18670	0.010081	0.0276866	0.00802214	IL10	1
BP	GO:0043032	positive regulation of macrophage activation	1/7	27/18670	0.010081	0.0276866	0.00802214	IL10	1
BP	GO:0048143	astrocyte activation	1/7	27/18670	0.010081	0.0276866	0.00802214	EGFR	1
BP	GO:0060143	positive regulation of syncytium formation by plasma membrane fusion	1/7	27/18670	0.010081	0.0276866	0.00802214	MAPK14	1
BP	GO:1905208	negative regulation of cardiocyte differentiation	1/7	27/18670	0.010081	0.0276866	0.00802214	EGFR	1
BP	GO:0001773	myeloid dendritic cell activation	1/7	28/18670	0.0104527	0.0281683	0.00816172	IL10	1
BP	GO:0002691	regulation of cellular extravasation	1/7	28/18670	0.0104527	0.0281683	0.00816172	ICAM1	1
BP	GO:0032647	regulation of interferon-alpha production	1/7	28/18670	0.0104527	0.0281683	0.00816172	IL10	1
BP	GO:0033598	mammary gland epithelial cell proliferation	1/7	28/18670	0.0104527	0.0281683	0.00816172	MAPK1	1
BP	GO:0034698	response to gonadotropin	1/7	28/18670	0.0104527	0.0281683	0.00816172	ICAM1	1
BP	GO:0036296	response to increased oxygen levels	1/7	28/18670	0.0104527	0.0281683	0.00816172	CAT	1
BP	GO:1904994	regulation of leukocyte adhesion to vascular endothelial cell	1/7	28/18670	0.0104527	0.0281683	0.00816172	ICAM1	1
BP	GO:2000108	positive regulation of leukocyte apoptotic process	1/7	28/18670	0.0104527	0.0281683	0.00816172	IL10	1
BP	GO:0006816	calcium ion transport	2/7	434/18670	0.0104785	0.0281718	0.00816275	ICAM1/PRKCB	2
BP	GO:0060249	anatomical structure homeostasis	2/7	437/18670	0.0106183	0.028481	0.00825233	MAPK1/EGFR	2
BP	GO:0010256	endomembrane system organization	2/7	438/18670	0.0106651	0.0285398	0.00826937	MAPK1/PRKCB	2
BP	GO:0007263	nitric oxide mediated signal transduction	1/7	29/18670	0.0108243	0.0286319	0.00829606	EGFR	1
BP	GO:0010800	positive regulation of peptidyl-threonine phosphorylation	1/7	29/18670	0.0108243	0.0286319	0.00829606	MAPK1	1
BP	GO:0050855	regulation of B cell receptor signaling pathway	1/7	29/18670	0.0108243	0.0286319	0.00829606	PRKCB	1
BP	GO:0060142	regulation of syncytium formation by plasma membrane fusion	1/7	29/18670	0.0108243	0.0286319	0.00829606	MAPK14	1
BP	GO:1900027	regulation of ruffle assembly	1/7	29/18670	0.0108243	0.0286319	0.00829606	ICAM1	1
BP	GO:0032607	interferon-alpha production	1/7	30/18670	0.0111957	0.0294111	0.00852184	IL10	1
BP	GO:0050869	negative regulation of B cell activation	1/7	30/18670	0.0111957	0.0294111	0.00852184	IL10	1
BP	GO:1903205	regulation of hydrogen peroxide-induced cell death	1/7	30/18670	0.0111957	0.0294111	0.00852184	IL10	1
BP	GO:0007202	activation of phospholipase C activity	1/7	31/18670	0.011567	0.030111	0.00872463	EGFR	1
BP	GO:0045648	positive regulation of erythrocyte differentiation	1/7	31/18670	0.011567	0.030111	0.00872463	MAPK14	1
BP	GO:0045737	positive regulation of cyclin-dependent protein serine/threonine kinase activity	1/7	31/18670	0.011567	0.030111	0.00872463	EGFR	1
BP	GO:1902895	positive regulation of pri-miRNA transcription by RNA polymerase II	1/7	31/18670	0.011567	0.030111	0.00872463	IL10	1
BP	GO:0002697	regulation of immune effector process	2/7	458/18670	0.0116206	0.0301821	0.00874522	IL10/MAPK14	2	immunity
BP	GO:0023061	signal release	2/7	462/18670	0.0118162	0.0304558	0.00882453	EGFR/PRKCB	2
BP	GO:0001819	positive regulation of cytokine production	2/7	464/18670	0.0119146	0.0304558	0.00882453	IL10/MAPK14	2	cytokine
BP	GO:0042110	T cell activation	2/7	464/18670	0.0119146	0.0304558	0.00882453	IL10/ICAM1	2
BP	GO:0001975	response to amphetamine	1/7	32/18670	0.0119382	0.0304558	0.00882453	ICAM1	1
BP	GO:0038128	ERBB2 signaling pathway	1/7	32/18670	0.0119382	0.0304558	0.00882453	EGFR	1
BP	GO:0042744	hydrogen peroxide catabolic process	1/7	32/18670	0.0119382	0.0304558	0.00882453	CAT	1
BP	GO:0051968	positive regulation of synaptic transmission, glutamatergic	1/7	32/18670	0.0119382	0.0304558	0.00882453	EGFR	1
BP	GO:0060674	placenta blood vessel development	1/7	32/18670	0.0119382	0.0304558	0.00882453	MAPK1	1
BP	GO:0045191	regulation of isotype switching	1/7	33/18670	0.0123093	0.0311258	0.00901867	IL10	1
BP	GO:2000352	negative regulation of endothelial cell apoptotic process	1/7	33/18670	0.0123093	0.0311258	0.00901867	ICAM1	1
BP	GO:2001024	negative regulation of response to drug	1/7	33/18670	0.0123093	0.0311258	0.00901867	IL10	1
BP	GO:2001038	regulation of cellular response to drug	1/7	33/18670	0.0123093	0.0311258	0.00901867	IL10	1
BP	GO:0002429	immune response-activating cell surface receptor signaling pathway	2/7	473/18670	0.0123617	0.0311895	0.00903713	MAPK1/PRKCB	2	immunity
BP	GO:1903706	regulation of hemopoiesis	2/7	475/18670	0.0124621	0.0313738	0.00909053	MAPK14/PRKCB	2
BP	GO:0007435	salivary gland morphogenesis	1/7	34/18670	0.0126803	0.0314406	0.00910988	EGFR	1
BP	GO:0032212	positive regulation of telomere maintenance via telomerase	1/7	34/18670	0.0126803	0.0314406	0.00910988	MAPK1	1
BP	GO:0036474	cell death in response to hydrogen peroxide	1/7	34/18670	0.0126803	0.0314406	0.00910988	IL10	1
BP	GO:0042533	tumor necrosis factor biosynthetic process	1/7	34/18670	0.0126803	0.0314406	0.00910988	IL10	1
BP	GO:0042534	regulation of tumor necrosis factor biosynthetic process	1/7	34/18670	0.0126803	0.0314406	0.00910988	IL10	1
BP	GO:0071868	cellular response to monoamine stimulus	1/7	34/18670	0.0126803	0.0314406	0.00910988	MAPK1	1
BP	GO:0071870	cellular response to catecholamine stimulus	1/7	34/18670	0.0126803	0.0314406	0.00910988	MAPK1	1
BP	GO:0070838	divalent metal ion transport	2/7	483/18670	0.0128673	0.0318105	0.00921705	ICAM1/PRKCB	2
BP	GO:0001893	maternal placenta development	1/7	35/18670	0.0130512	0.0318105	0.00921705	MAPK1	1
BP	GO:0002701	negative regulation of production of molecular mediator of immune response	1/7	35/18670	0.0130512	0.0318105	0.00921705	IL10	1	immunity
BP	GO:0032689	negative regulation of interferon-gamma production	1/7	35/18670	0.0130512	0.0318105	0.00921705	IL10	1
BP	GO:0032735	positive regulation of interleukin-12 production	1/7	35/18670	0.0130512	0.0318105	0.00921705	MAPK14	1
BP	GO:0042092	type 2 immune response	1/7	35/18670	0.0130512	0.0318105	0.00921705	IL10	1	immunity
BP	GO:0071312	cellular response to alkaloid	1/7	35/18670	0.0130512	0.0318105	0.00921705	ICAM1	1
BP	GO:1904031	positive regulation of cyclin-dependent protein kinase activity	1/7	35/18670	0.0130512	0.0318105	0.00921705	EGFR	1
BP	GO:0072511	divalent inorganic cation transport	2/7	489/18670	0.0131751	0.0320444	0.00928483	ICAM1/PRKCB	2
BP	GO:0009112	nucleobase metabolic process	1/7	36/18670	0.0134219	0.0321677	0.00932056	MAPK1	1
BP	GO:0030947	regulation of vascular endothelial growth factor receptor signaling pathway	1/7	36/18670	0.0134219	0.0321677	0.00932056	PRKCB	1
BP	GO:0042554	superoxide anion generation	1/7	36/18670	0.0134219	0.0321677	0.00932056	EGFR	1
BP	GO:0045740	positive regulation of DNA replication	1/7	36/18670	0.0134219	0.0321677	0.00932056	EGFR	1
BP	GO:0046627	negative regulation of insulin receptor signaling pathway	1/7	36/18670	0.0134219	0.0321677	0.00932056	PRKCB	1
BP	GO:0051973	positive regulation of telomerase activity	1/7	36/18670	0.0134219	0.0321677	0.00932056	MAPK1	1
BP	GO:0090322	regulation of superoxide metabolic process	1/7	36/18670	0.0134219	0.0321677	0.00932056	EGFR	1
BP	GO:0007431	salivary gland development	1/7	37/18670	0.0137925	0.0327822	0.00949861	EGFR	1
BP	GO:0038083	peptidyl-tyrosine autophosphorylation	1/7	37/18670	0.0137925	0.0327822	0.00949861	EGFR	1
BP	GO:1903427	negative regulation of reactive oxygen species biosynthetic process	1/7	37/18670	0.0137925	0.0327822	0.00949861	IL10	1
BP	GO:1904358	positive regulation of telomere maintenance via telomere lengthening	1/7	37/18670	0.0137925	0.0327822	0.00949861	MAPK1	1
BP	GO:0010831	positive regulation of myotube differentiation	1/7	38/18670	0.014163	0.033047	0.00957534	MAPK14	1
BP	GO:0016572	histone phosphorylation	1/7	38/18670	0.014163	0.033047	0.00957534	PRKCB	1
BP	GO:0045022	early endosome to late endosome transport	1/7	38/18670	0.014163	0.033047	0.00957534	MAPK1	1
BP	GO:0046326	positive regulation of glucose import	1/7	38/18670	0.014163	0.033047	0.00957534	MAPK14	1
BP	GO:0048246	macrophage chemotaxis	1/7	38/18670	0.014163	0.033047	0.00957534	MAPK14	1
BP	GO:0071867	response to monoamine	1/7	38/18670	0.014163	0.033047	0.00957534	MAPK1	1
BP	GO:0071869	response to catecholamine	1/7	38/18670	0.014163	0.033047	0.00957534	MAPK1	1
BP	GO:1900077	negative regulation of cellular response to insulin stimulus	1/7	38/18670	0.014163	0.033047	0.00957534	PRKCB	1
BP	GO:1904706	negative regulation of vascular smooth muscle cell proliferation	1/7	38/18670	0.014163	0.033047	0.00957534	IL10	1
BP	GO:0032692	negative regulation of interleukin-1 production	1/7	39/18670	0.0145334	0.0336378	0.0097465	IL10	1
BP	GO:0051930	regulation of sensory perception of pain	1/7	39/18670	0.0145334	0.0336378	0.0097465	IL10	1
BP	GO:1902042	negative regulation of extrinsic apoptotic signaling pathway via death domain receptors	1/7	39/18670	0.0145334	0.0336378	0.0097465	ICAM1	1
BP	GO:1905521	regulation of macrophage migration	1/7	39/18670	0.0145334	0.0336378	0.0097465	MAPK14	1
BP	GO:0042036	negative regulation of cytokine biosynthetic process	1/7	40/18670	0.0149037	0.0342874	0.00993472	IL10	1	cytokine
BP	GO:0045124	regulation of bone resorption	1/7	40/18670	0.0149037	0.0342874	0.00993472	EGFR	1
BP	GO:0051931	regulation of sensory perception	1/7	40/18670	0.0149037	0.0342874	0.00993472	IL10	1
BP	GO:0007520	myoblast fusion	1/7	41/18670	0.0152738	0.0347214	0.0100605	MAPK14	1
BP	GO:0050873	brown fat cell differentiation	1/7	41/18670	0.0152738	0.0347214	0.0100605	MAPK14	1
BP	GO:0061028	establishment of endothelial barrier	1/7	41/18670	0.0152738	0.0347214	0.0100605	ICAM1	1
BP	GO:0097178	ruffle assembly	1/7	41/18670	0.0152738	0.0347214	0.0100605	ICAM1	1
BP	GO:0098927	vesicle-mediated transport between endosomal compartments	1/7	41/18670	0.0152738	0.0347214	0.0100605	MAPK1	1
BP	GO:1902893	regulation of pri-miRNA transcription by RNA polymerase II	1/7	41/18670	0.0152738	0.0347214	0.0100605	IL10	1
BP	GO:0006509	membrane protein ectodomain proteolysis	1/7	42/18670	0.0156438	0.0353525	0.0102434	IL10	1
BP	GO:0010470	regulation of gastrulation	1/7	42/18670	0.0156438	0.0353525	0.0102434	IL10	1
BP	GO:1901031	regulation of response to reactive oxygen species	1/7	42/18670	0.0156438	0.0353525	0.0102434	IL10	1
BP	GO:0010863	positive regulation of phospholipase C activity	1/7	43/18670	0.0160137	0.0356274	0.010323	EGFR	1
BP	GO:0021795	cerebral cortex cell migration	1/7	43/18670	0.0160137	0.0356274	0.010323	EGFR	1
BP	GO:0031279	regulation of cyclase activity	1/7	43/18670	0.0160137	0.0356274	0.010323	MAPK14	1
BP	GO:0034198	cellular response to amino acid starvation	1/7	43/18670	0.0160137	0.0356274	0.010323	MAPK1	1
BP	GO:0045429	positive regulation of nitric oxide biosynthetic process	1/7	43/18670	0.0160137	0.0356274	0.010323	ICAM1	1
BP	GO:0045746	negative regulation of Notch signaling pathway	1/7	43/18670	0.0160137	0.0356274	0.010323	EGFR	1
BP	GO:0071364	cellular response to epidermal growth factor stimulus	1/7	43/18670	0.0160137	0.0356274	0.010323	EGFR	1
BP	GO:1904646	cellular response to amyloid-beta	1/7	43/18670	0.0160137	0.0356274	0.010323	ICAM1	1
BP	GO:0010828	positive regulation of glucose transmembrane transport	1/7	44/18670	0.0163835	0.0359622	0.01042	MAPK14	1
BP	GO:0014002	astrocyte development	1/7	44/18670	0.0163835	0.0359622	0.01042	EGFR	1
BP	GO:0034105	positive regulation of tissue remodeling	1/7	44/18670	0.0163835	0.0359622	0.01042	EGFR	1
BP	GO:0046688	response to copper ion	1/7	44/18670	0.0163835	0.0359622	0.01042	ICAM1	1
BP	GO:0061756	leukocyte adhesion to vascular endothelial cell	1/7	44/18670	0.0163835	0.0359622	0.01042	ICAM1	1
BP	GO:0071622	regulation of granulocyte chemotaxis	1/7	44/18670	0.0163835	0.0359622	0.01042	MAPK14	1
BP	GO:1904407	positive regulation of nitric oxide metabolic process	1/7	44/18670	0.0163835	0.0359622	0.01042	ICAM1	1
BP	GO:0048255	mRNA stabilization	1/7	45/18670	0.0167531	0.0365639	0.0105943	MAPK14	1
BP	GO:0048538	thymus development	1/7	45/18670	0.0167531	0.0365639	0.0105943	MAPK1	1
BP	GO:1900274	regulation of phospholipase C activity	1/7	45/18670	0.0167531	0.0365639	0.0105943	EGFR	1
BP	GO:0007157	heterophilic cell-cell adhesion via plasma membrane cell adhesion molecules	1/7	46/18670	0.0171227	0.0366732	0.010626	ICAM1	1
BP	GO:0014075	response to amine	1/7	46/18670	0.0171227	0.0366732	0.010626	ICAM1	1
BP	GO:0032480	negative regulation of type I interferon production	1/7	46/18670	0.0171227	0.0366732	0.010626	IL10	1
BP	GO:0035196	production of miRNAs involved in gene silencing by miRNA	1/7	46/18670	0.0171227	0.0366732	0.010626	EGFR	1
BP	GO:0043330	response to exogenous dsRNA	1/7	46/18670	0.0171227	0.0366732	0.010626	MAPK1	1
BP	GO:0071354	cellular response to interleukin-6	1/7	46/18670	0.0171227	0.0366732	0.010626	ICAM1	1
BP	GO:0071675	regulation of mononuclear cell migration	1/7	46/18670	0.0171227	0.0366732	0.010626	MAPK14	1
BP	GO:1900015	regulation of cytokine production involved in inflammatory response	1/7	46/18670	0.0171227	0.0366732	0.010626	MAPK14	1	cytokine
BP	GO:1904036	negative regulation of epithelial cell apoptotic process	1/7	46/18670	0.0171227	0.0366732	0.010626	ICAM1	1
BP	GO:1990928	response to amino acid starvation	1/7	46/18670	0.0171227	0.0366732	0.010626	MAPK1	1
BP	GO:0002204	somatic recombination of immunoglobulin genes involved in immune response	1/7	47/18670	0.0174921	0.0369815	0.0107153	IL10	1	immunity
BP	GO:0002208	somatic diversification of immunoglobulins involved in immune response	1/7	47/18670	0.0174921	0.0369815	0.0107153	IL10	1	immunity
BP	GO:0010799	regulation of peptidyl-threonine phosphorylation	1/7	47/18670	0.0174921	0.0369815	0.0107153	MAPK1	1
BP	GO:0035722	interleukin-12-mediated signaling pathway	1/7	47/18670	0.0174921	0.0369815	0.0107153	IL10	1
BP	GO:0045190	isotype switching	1/7	47/18670	0.0174921	0.0369815	0.0107153	IL10	1
BP	GO:0045646	regulation of erythrocyte differentiation	1/7	47/18670	0.0174921	0.0369815	0.0107153	MAPK14	1
BP	GO:0061614	pri-miRNA transcription by RNA polymerase II	1/7	47/18670	0.0174921	0.0369815	0.0107153	IL10	1
BP	GO:0035272	exocrine system development	1/7	48/18670	0.0178614	0.0374177	0.0108417	EGFR	1
BP	GO:0042059	negative regulation of epidermal growth factor receptor signaling pathway	1/7	48/18670	0.0178614	0.0374177	0.0108417	EGFR	1
BP	GO:0046850	regulation of bone remodeling	1/7	48/18670	0.0178614	0.0374177	0.0108417	EGFR	1
BP	GO:0051972	regulation of telomerase activity	1/7	48/18670	0.0178614	0.0374177	0.0108417	MAPK1	1
BP	GO:0060324	face development	1/7	48/18670	0.0178614	0.0374177	0.0108417	MAPK1	1
BP	GO:0002534	cytokine production involved in inflammatory response	1/7	49/18670	0.0182306	0.0377775	0.010946	MAPK14	1	cytokine
BP	GO:0035094	response to nicotine	1/7	49/18670	0.0182306	0.0377775	0.010946	MAPK1	1
BP	GO:0048546	digestive tract morphogenesis	1/7	49/18670	0.0182306	0.0377775	0.010946	EGFR	1
BP	GO:0051205	protein insertion into membrane	1/7	49/18670	0.0182306	0.0377775	0.010946	EGFR	1
BP	GO:0071349	cellular response to interleukin-12	1/7	49/18670	0.0182306	0.0377775	0.010946	IL10	1
BP	GO:1904707	positive regulation of vascular smooth muscle cell proliferation	1/7	49/18670	0.0182306	0.0377775	0.010946	IL10	1
BP	GO:0043489	RNA stabilization	1/7	50/18670	0.0185997	0.0381975	0.0110677	MAPK14	1
BP	GO:0060425	lung morphogenesis	1/7	50/18670	0.0185997	0.0381975	0.0110677	MAPK1	1
BP	GO:0070671	response to interleukin-12	1/7	50/18670	0.0185997	0.0381975	0.0110677	IL10	1
BP	GO:0070741	response to interleukin-6	1/7	50/18670	0.0185997	0.0381975	0.0110677	ICAM1	1
BP	GO:1900087	positive regulation of G1/S transition of mitotic cell cycle	1/7	50/18670	0.0185997	0.0381975	0.0110677	EGFR	1
BP	GO:0002712	regulation of B cell mediated immunity	1/7	51/18670	0.0189686	0.0384056	0.011128	IL10	1	immunity
BP	GO:0002889	regulation of immunoglobulin mediated immune response	1/7	51/18670	0.0189686	0.0384056	0.011128	IL10	1	immunity
BP	GO:0031050	dsRNA processing	1/7	51/18670	0.0189686	0.0384056	0.011128	EGFR	1
BP	GO:0032206	positive regulation of telomere maintenance	1/7	51/18670	0.0189686	0.0384056	0.011128	MAPK1	1
BP	GO:0048146	positive regulation of fibroblast proliferation	1/7	51/18670	0.0189686	0.0384056	0.011128	EGFR	1
BP	GO:0050999	regulation of nitric-oxide synthase activity	1/7	51/18670	0.0189686	0.0384056	0.011128	EGFR	1
BP	GO:0070918	production of small RNA involved in gene silencing by RNA	1/7	51/18670	0.0189686	0.0384056	0.011128	EGFR	1
BP	GO:0097366	response to bronchodilator	1/7	51/18670	0.0189686	0.0384056	0.011128	ICAM1	1
BP	GO:0006998	nuclear envelope organization	1/7	52/18670	0.0193374	0.0388781	0.0112649	PRKCB	1
BP	GO:0016447	somatic recombination of immunoglobulin gene segments	1/7	52/18670	0.0193374	0.0388781	0.0112649	IL10	1	immunity
BP	GO:0031529	ruffle organization	1/7	52/18670	0.0193374	0.0388781	0.0112649	ICAM1	1
BP	GO:1902373	negative regulation of mRNA catabolic process	1/7	52/18670	0.0193374	0.0388781	0.0112649	MAPK14	1
BP	GO:0032715	negative regulation of interleukin-6 production	1/7	53/18670	0.0197062	0.0391396	0.0113406	IL10	1
BP	GO:0038066	p38MAPK cascade	1/7	53/18670	0.0197062	0.0391396	0.0113406	MAPK14	1
BP	GO:0043331	response to dsRNA	1/7	53/18670	0.0197062	0.0391396	0.0113406	MAPK1	1
BP	GO:0045661	regulation of myoblast differentiation	1/7	53/18670	0.0197062	0.0391396	0.0113406	MAPK14	1
BP	GO:0070228	regulation of lymphocyte apoptotic process	1/7	53/18670	0.0197062	0.0391396	0.0113406	IL10	1
BP	GO:1901185	negative regulation of ERBB signaling pathway	1/7	53/18670	0.0197062	0.0391396	0.0113406	EGFR	1
BP	GO:1905517	macrophage migration	1/7	53/18670	0.0197062	0.0391396	0.0113406	MAPK14	1
BP	GO:0002720	positive regulation of cytokine production involved in immune response	1/7	54/18670	0.0200747	0.0396658	0.0114931	MAPK14	1	immunity
BP	GO:0032210	regulation of telomere maintenance via telomerase	1/7	54/18670	0.0200747	0.0396658	0.0114931	MAPK1	1
BP	GO:1904645	response to amyloid-beta	1/7	54/18670	0.0200747	0.0396658	0.0114931	ICAM1	1
BP	GO:0001541	ovarian follicle development	1/7	55/18670	0.0204432	0.0401863	0.0116439	ICAM1	1
BP	GO:0016233	telomere capping	1/7	55/18670	0.0204432	0.0401863	0.0116439	MAPK1	1
BP	GO:0043030	regulation of macrophage activation	1/7	55/18670	0.0204432	0.0401863	0.0116439	IL10	1
BP	GO:0000768	syncytium formation by plasma membrane fusion	1/7	56/18670	0.0208116	0.0404259	0.0117133	MAPK14	1
BP	GO:0002381	immunoglobulin production involved in immunoglobulin mediated immune response	1/7	56/18670	0.0208116	0.0404259	0.0117133	IL10	1	immunity
BP	GO:0022029	telencephalon cell migration	1/7	56/18670	0.0208116	0.0404259	0.0117133	EGFR	1
BP	GO:0098586	cellular response to virus	1/7	56/18670	0.0208116	0.0404259	0.0117133	MAPK14	1	virus
BP	GO:0140253	cell-cell fusion	1/7	56/18670	0.0208116	0.0404259	0.0117133	MAPK14	1
BP	GO:1903078	positive regulation of protein localization to plasma membrane	1/7	56/18670	0.0208116	0.0404259	0.0117133	EGFR	1
BP	GO:1903202	negative regulation of oxidative stress-induced cell death	1/7	56/18670	0.0208116	0.0404259	0.0117133	IL10	1
BP	GO:1900408	negative regulation of cellular response to oxidative stress	1/7	57/18670	0.0211798	0.0410024	0.0118804	IL10	1
BP	GO:1903428	positive regulation of reactive oxygen species biosynthetic process	1/7	57/18670	0.0211798	0.0410024	0.0118804	ICAM1	1
BP	GO:0006949	syncytium formation	1/7	58/18670	0.0215479	0.0414355	0.0120059	MAPK14	1
BP	GO:0017001	antibiotic catabolic process	1/7	58/18670	0.0215479	0.0414355	0.0120059	CAT	1
BP	GO:0061900	glial cell activation	1/7	58/18670	0.0215479	0.0414355	0.0120059	EGFR	1
BP	GO:1902041	regulation of extrinsic apoptotic signaling pathway via death domain receptors	1/7	58/18670	0.0215479	0.0414355	0.0120059	ICAM1	1
BP	GO:0001885	endothelial cell development	1/7	59/18670	0.0219159	0.0415173	0.0120296	ICAM1	1
BP	GO:0010518	positive regulation of phospholipase activity	1/7	59/18670	0.0219159	0.0415173	0.0120296	EGFR	1
BP	GO:0021885	forebrain cell migration	1/7	59/18670	0.0219159	0.0415173	0.0120296	EGFR	1
BP	GO:0033619	membrane protein proteolysis	1/7	59/18670	0.0219159	0.0415173	0.0120296	IL10	1
BP	GO:0042130	negative regulation of T cell proliferation	1/7	59/18670	0.0219159	0.0415173	0.0120296	IL10	1
BP	GO:0097755	positive regulation of blood vessel diameter	1/7	59/18670	0.0219159	0.0415173	0.0120296	EGFR	1
BP	GO:1902369	negative regulation of RNA catabolic process	1/7	59/18670	0.0219159	0.0415173	0.0120296	MAPK14	1
BP	GO:1902883	negative regulation of response to oxidative stress	1/7	59/18670	0.0219159	0.0415173	0.0120296	IL10	1
BP	GO:2000351	regulation of endothelial cell apoptotic process	1/7	59/18670	0.0219159	0.0415173	0.0120296	ICAM1	1
BP	GO:0046324	regulation of glucose import	1/7	60/18670	0.0222838	0.0420753	0.0121913	MAPK14	1
BP	GO:1902808	positive regulation of cell cycle G1/S phase transition	1/7	60/18670	0.0222838	0.0420753	0.0121913	EGFR	1
BP	GO:0030888	regulation of B cell proliferation	1/7	61/18670	0.0226516	0.0424902	0.0123115	IL10	1
BP	GO:0034113	heterotypic cell-cell adhesion	1/7	61/18670	0.0226516	0.0424902	0.0123115	IL10	1
BP	GO:0045123	cellular extravasation	1/7	61/18670	0.0226516	0.0424902	0.0123115	ICAM1	1
BP	GO:0048645	animal organ formation	1/7	61/18670	0.0226516	0.0424902	0.0123115	MAPK1	1
BP	GO:0002562	somatic diversification of immune receptors via germline recombination within a single locus	1/7	62/18670	0.0230192	0.0428299	0.0124099	IL10	1	immunity
BP	GO:0010830	regulation of myotube differentiation	1/7	62/18670	0.0230192	0.0428299	0.0124099	MAPK14	1
BP	GO:0016444	somatic cell DNA recombination	1/7	62/18670	0.0230192	0.0428299	0.0124099	IL10	1
BP	GO:0045453	bone resorption	1/7	62/18670	0.0230192	0.0428299	0.0124099	EGFR	1
BP	GO:1904356	regulation of telomere maintenance via telomere lengthening	1/7	62/18670	0.0230192	0.0428299	0.0124099	MAPK1	1
BP	GO:0002637	regulation of immunoglobulin production	1/7	63/18670	0.0233867	0.0433731	0.0125673	IL10	1	immunity
BP	GO:1904377	positive regulation of protein localization to cell periphery	1/7	63/18670	0.0233867	0.0433731	0.0125673	EGFR	1
BP	GO:0016445	somatic diversification of immunoglobulins	1/7	64/18670	0.0237541	0.0436316	0.0126422	IL10	1	immunity
BP	GO:0032768	regulation of monooxygenase activity	1/7	64/18670	0.0237541	0.0436316	0.0126422	EGFR	1
BP	GO:0045600	positive regulation of fat cell differentiation	1/7	64/18670	0.0237541	0.0436316	0.0126422	MAPK14	1
BP	GO:0060135	maternal process involved in female pregnancy	1/7	64/18670	0.0237541	0.0436316	0.0126422	MAPK1	1
BP	GO:1903672	positive regulation of sprouting angiogenesis	1/7	64/18670	0.0237541	0.0436316	0.0126422	IL10	1
BP	GO:2000378	negative regulation of reactive oxygen species metabolic process	1/7	64/18670	0.0237541	0.0436316	0.0126422	IL10	1
BP	GO:0045739	positive regulation of DNA repair	1/7	65/18670	0.0241214	0.0440245	0.012756	EGFR	1
BP	GO:0050854	regulation of antigen receptor-mediated signaling pathway	1/7	65/18670	0.0241214	0.0440245	0.012756	PRKCB	1
BP	GO:0051187	cofactor catabolic process	1/7	65/18670	0.0241214	0.0440245	0.012756	CAT	1
BP	GO:0072678	T cell migration	1/7	65/18670	0.0241214	0.0440245	0.012756	ICAM1	1
BP	GO:0046626	regulation of insulin receptor signaling pathway	1/7	66/18670	0.0244886	0.0444824	0.0128887	PRKCB	1
BP	GO:0051926	negative regulation of calcium ion transport	1/7	66/18670	0.0244886	0.0444824	0.0128887	ICAM1	1
BP	GO:1905207	regulation of cardiocyte differentiation	1/7	66/18670	0.0244886	0.0444824	0.0128887	EGFR	1
BP	GO:0048662	negative regulation of smooth muscle cell proliferation	1/7	67/18670	0.0248556	0.0450067	0.0130406	IL10	1
BP	GO:2000573	positive regulation of DNA biosynthetic process	1/7	67/18670	0.0248556	0.0450067	0.0130406	MAPK1	1
BP	GO:0006625	protein targeting to peroxisome	1/7	68/18670	0.0252226	0.045102	0.0130683	CAT	1
BP	GO:0033627	cell adhesion mediated by integrin	1/7	68/18670	0.0252226	0.045102	0.0130683	ICAM1	1
BP	GO:0035924	cellular response to vascular endothelial growth factor stimulus	1/7	68/18670	0.0252226	0.045102	0.0130683	MAPK14	1
BP	GO:0046323	glucose import	1/7	68/18670	0.0252226	0.045102	0.0130683	MAPK14	1
BP	GO:0071230	cellular response to amino acid stimulus	1/7	68/18670	0.0252226	0.045102	0.0130683	EGFR	1
BP	GO:0071242	cellular response to ammonium ion	1/7	68/18670	0.0252226	0.045102	0.0130683	MAPK1	1
BP	GO:0072662	protein localization to peroxisome	1/7	68/18670	0.0252226	0.045102	0.0130683	CAT	1
BP	GO:0072663	establishment of protein localization to peroxisome	1/7	68/18670	0.0252226	0.045102	0.0130683	CAT	1
BP	GO:0042698	ovulation cycle	1/7	69/18670	0.0255894	0.0455451	0.0131966	EGFR	1
BP	GO:0043574	peroxisomal transport	1/7	69/18670	0.0255894	0.0455451	0.0131966	CAT	1
BP	GO:0070227	lymphocyte apoptotic process	1/7	69/18670	0.0255894	0.0455451	0.0131966	IL10	1
BP	GO:0007004	telomere maintenance via telomerase	1/7	70/18670	0.0259561	0.045913	0.0133032	MAPK1	1
BP	GO:0010517	regulation of phospholipase activity	1/7	70/18670	0.0259561	0.045913	0.0133032	EGFR	1
BP	GO:0032720	negative regulation of tumor necrosis factor production	1/7	70/18670	0.0259561	0.045913	0.0133032	IL10	1
BP	GO:0051966	regulation of synaptic transmission, glutamatergic	1/7	70/18670	0.0259561	0.045913	0.0133032	EGFR	1
BP	GO:0071479	cellular response to ionizing radiation	1/7	71/18670	0.0263226	0.0464898	0.0134704	MAPK14	1
BP	GO:0002532	production of molecular mediator involved in inflammatory response	1/7	72/18670	0.0266891	0.0467772	0.0135536	MAPK14	1	inflammatory
BP	GO:0051155	positive regulation of striated muscle cell differentiation	1/7	72/18670	0.0266891	0.0467772	0.0135536	MAPK14	1
BP	GO:0060193	positive regulation of lipase activity	1/7	72/18670	0.0266891	0.0467772	0.0135536	EGFR	1
BP	GO:0061180	mammary gland epithelium development	1/7	72/18670	0.0266891	0.0467772	0.0135536	MAPK1	1
BP	GO:1903556	negative regulation of tumor necrosis factor superfamily cytokine production	1/7	72/18670	0.0266891	0.0467772	0.0135536	IL10	1	cytokine
BP	GO:0002312	B cell activation involved in immune response	1/7	73/18670	0.0270554	0.0470601	0.0136356	IL10	1	immunity
BP	GO:0006801	superoxide metabolic process	1/7	73/18670	0.0270554	0.0470601	0.0136356	EGFR	1
BP	GO:0032945	negative regulation of mononuclear cell proliferation	1/7	73/18670	0.0270554	0.0470601	0.0136356	IL10	1
BP	GO:0043627	response to estrogen	1/7	73/18670	0.0270554	0.0470601	0.0136356	MAPK1	1
BP	GO:0050672	negative regulation of lymphocyte proliferation	1/7	73/18670	0.0270554	0.0470601	0.0136356	IL10	1
BP	GO:0032677	regulation of interleukin-8 production	1/7	74/18670	0.0274217	0.0474812	0.0137576	IL10	1
BP	GO:0050710	negative regulation of cytokine secretion	1/7	74/18670	0.0274217	0.0474812	0.0137576	IL10	1	cytokine
BP	GO:1900076	regulation of cellular response to insulin stimulus	1/7	74/18670	0.0274217	0.0474812	0.0137576	PRKCB	1
BP	GO:0002200	somatic diversification of immune receptors	1/7	75/18670	0.0277878	0.0478984	0.0138785	IL10	1	immunity
BP	GO:0150076	neuroinflammatory response	1/7	75/18670	0.0277878	0.0478984	0.0138785	EGFR	1	inflammatory
BP	GO:1903201	regulation of oxidative stress-induced cell death	1/7	75/18670	0.0277878	0.0478984	0.0138785	IL10	1
BP	GO:0006278	RNA-dependent DNA biosynthetic process	1/7	77/18670	0.0285196	0.0490128	0.0142014	MAPK1	1
BP	GO:1901224	positive regulation of NIK/NF-kappaB signaling	1/7	77/18670	0.0285196	0.0490128	0.0142014	EGFR	1
BP	GO:0001910	regulation of leukocyte mediated cytotoxicity	1/7	78/18670	0.0288854	0.0493458	0.0142979	ICAM1	1
BP	GO:0070664	negative regulation of leukocyte proliferation	1/7	78/18670	0.0288854	0.0493458	0.0142979	IL10	1
BP	GO:0090398	cellular senescence	1/7	78/18670	0.0288854	0.0493458	0.0142979	MAPK14	1
BP	GO:2000300	regulation of synaptic vesicle exocytosis	1/7	78/18670	0.0288854	0.0493458	0.0142979	PRKCB	1
BP	GO:0071260	cellular response to mechanical stimulus	1/7	79/18670	0.029251	0.0497484	0.0144145	EGFR	1
BP	GO:1900034	regulation of cellular response to heat	1/7	79/18670	0.029251	0.0497484	0.0144145	MAPK1	1
BP	GO:1903312	negative regulation of mRNA metabolic process	1/7	79/18670	0.029251	0.0497484	0.0144145	MAPK14	1
CC	GO:0031983	vesicle lumen	4/7	339/19717	2.88468e-06	0.000111056	4.77484e-05	MAPK1/EGFR/MAPK14/CAT	4
CC	GO:0005925	focal adhesion	4/7	405/19717	5.84577e-06	0.000111056	4.77484e-05	MAPK1/EGFR/ICAM1/CAT	4
CC	GO:0005924	cell-substrate adherens junction	4/7	408/19717	6.01933e-06	0.000111056	4.77484e-05	MAPK1/EGFR/ICAM1/CAT	4
CC	GO:0030055	cell-substrate junction	4/7	412/19717	6.25669e-06	0.000111056	4.77484e-05	MAPK1/EGFR/ICAM1/CAT	4
CC	GO:1904813	ficolin-1-rich granule lumen	3/7	124/19717	8.34231e-06	0.000118461	5.0932e-05	MAPK1/MAPK14/CAT	3
CC	GO:0101002	ficolin-1-rich granule	3/7	185/19717	2.76688e-05	0.000327414	0.000140771	MAPK1/MAPK14/CAT	3
CC	GO:0045121	membrane raft	3/7	315/19717	0.000134796	0.00107179	0.000460813	MAPK1/EGFR/ICAM1	3
CC	GO:0098857	membrane microdomain	3/7	316/19717	0.000136067	0.00107179	0.000460813	MAPK1/EGFR/ICAM1	3
CC	GO:0034774	secretory granule lumen	3/7	321/19717	0.00014254	0.00107179	0.000460813	MAPK1/MAPK14/CAT	3
CC	GO:0098589	membrane region	3/7	328/19717	0.000151937	0.00107179	0.000460813	MAPK1/EGFR/ICAM1	3
CC	GO:0060205	cytoplasmic vesicle lumen	3/7	338/19717	0.000166052	0.00107179	0.000460813	MAPK1/MAPK14/CAT	3
CC	GO:0005770	late endosome	2/7	256/19717	0.00337791	0.019986	0.00859292	MAPK1/EGFR	2
CC	GO:0099523	presynaptic cytosol	1/7	14/19717	0.00496051	0.027092	0.0116482	PRKCB	1
CC	GO:0031143	pseudopodium	1/7	17/19717	0.00602073	0.0276034	0.011868	MAPK1	1
CC	GO:0005819	spindle	2/7	347/19717	0.00611726	0.0276034	0.011868	MAPK1/MAPK14	2
CC	GO:0005769	early endosome	2/7	350/19717	0.00622048	0.0276034	0.011868	MAPK1/EGFR	2
CC	GO:0044305	calyx of Held	1/7	24/19717	0.0084908	0.0334915	0.0143996	PRKCB	1
CC	GO:0099522	region of cytosol	1/7	24/19717	0.0084908	0.0334915	0.0143996	PRKCB	1
CC	GO:0032839	dendrite cytoplasm	1/7	32/19717	0.0113073	0.0422536	0.0181669	MAPK1	1
CC	GO:0009925	basal plasma membrane	1/7	34/19717	0.0120104	0.0426368	0.0183316	EGFR	1
CC	GO:0001772	immunological synapse	1/7	36/19717	0.012713	0.042982	0.01848	ICAM1	1	immunity
MF	GO:0004707	MAP kinase activity	2/7	14/17697	1.21768e-05	0.000294274	0.000118273	MAPK1/MAPK14	2
MF	GO:0004674	protein serine/threonine kinase activity	4/7	439/17697	1.23215e-05	0.000294274	0.000118273	MAPK1/EGFR/MAPK14/PRKCB	4
MF	GO:0004708	MAP kinase kinase activity	2/7	16/17697	1.60513e-05	0.000294274	0.000118273	MAPK1/MAPK14	2
MF	GO:0019902	phosphatase binding	3/7	185/17697	3.81452e-05	0.000524496	0.000210802	MAPK1/EGFR/MAPK14	3
MF	GO:0004712	protein serine/threonine/tyrosine kinase activity	2/7	43/17697	0.000120173	0.0013219	0.000531291	MAPK1/MAPK14	2
MF	GO:0001618	virus receptor activity	2/7	74/17697	0.000357359	0.00280782	0.0011285	EGFR/ICAM1	2	virus
MF	GO:0104005	hijacked molecular function	2/7	74/17697	0.000357359	0.00280782	0.0011285	EGFR/ICAM1	2
MF	GO:0005178	integrin binding	2/7	132/17697	0.00113146	0.00776966	0.00312273	EGFR/ICAM1	2
MF	GO:0019903	protein phosphatase binding	2/7	140/17697	0.0012714	0.00776966	0.00312273	EGFR/MAPK14	2
MF	GO:0004697	protein kinase C activity	1/7	16/17697	0.00631268	0.0300358	0.0120718	PRKCB	1
MF	GO:0035173	histone kinase activity	1/7	17/17697	0.00670609	0.0300358	0.0120718	PRKCB	1
MF	GO:0008353	RNA polymerase II CTD heptapeptide repeat kinase activity	1/7	18/17697	0.00709936	0.0300358	0.0120718	MAPK1	1
MF	GO:0031435	mitogen-activated protein kinase kinase kinase binding	1/7	18/17697	0.00709936	0.0300358	0.0120718	MAPK1	1
MF	GO:0004709	MAP kinase kinase kinase activity	1/7	26/17697	0.0102407	0.0375494	0.0150916	EGFR	1
MF	GO:0051019	mitogen-activated protein kinase binding	1/7	26/17697	0.0102407	0.0375494	0.0150916	MAPK14	1
MF	GO:0050839	cell adhesion molecule binding	2/7	499/17697	0.0151678	0.0496915	0.0199717	EGFR/ICAM1	2
MF	GO:0001784	phosphotyrosine residue binding	1/7	40/17697	0.0157177	0.0496915	0.0199717	MAPK1	1
MF	GO:0050681	androgen receptor binding	1/7	44/17697	0.0172777	0.0496915	0.0199717	PRKCB	1
MF	GO:0005246	calcium channel regulator activity	1/7	48/17697	0.0188356	0.0496915	0.0199717	PRKCB	1
MF	GO:0045309	protein phosphorylated amino acid binding	1/7	51/17697	0.0200027	0.0496915	0.0199717	MAPK1	1
MF	GO:0004601	peroxidase activity	1/7	52/17697	0.0203915	0.0496915	0.0199717	CAT	1
MF	GO:0050661	NADP binding	1/7	52/17697	0.0203915	0.0496915	0.0199717	CAT	1
MF	GO:0005080	protein kinase C binding	1/7	53/17697	0.0207801	0.0496915	0.0199717	PRKCB	1

## Sheet: Bio
ONTOLOGY	ID	Description	GeneRatio	BgRatio	pvalue	p.adjust	qvalue	geneID	Count	remark
BP	GO:0098586	cellular response to virus	1/7	56/18670	0.0208116	0.0404259	0.0117133	MAPK14	1	virus
BP	GO:0002739	regulation of cytokine secretion involved in immune response	2/7	16/18670	1.44238e-05	0.000487015	0.000141112	IL10/MAPK14	2	immunity
BP	GO:0002374	cytokine secretion involved in immune response	2/7	20/18670	2.28214e-05	0.000654973	0.000189778	IL10/MAPK14	2	immunity
BP	GO:0002718	regulation of cytokine production involved in immune response	2/7	84/18670	0.000413949	0.00397573	0.00115196	IL10/MAPK14	2	immunity
BP	GO:0002283	neutrophil activation involved in immune response	3/7	488/18670	0.000574343	0.00495749	0.00143643	MAPK1/MAPK14/CAT	3	immunity
BP	GO:0002367	cytokine production involved in immune response	2/7	102/18670	0.000609696	0.00502063	0.00145472	IL10/MAPK14	2	immunity
BP	GO:0002446	neutrophil mediated immunity	3/7	499/18670	0.000613045	0.00502063	0.00145472	MAPK1/MAPK14/CAT	3	immunity
BP	GO:0002700	regulation of production of molecular mediator of immune response	2/7	139/18670	0.00112774	0.00757105	0.0021937	IL10/MAPK14	2	immunity
BP	GO:0002285	lymphocyte activation involved in immune response	2/7	181/18670	0.00190108	0.0108579	0.00314607	IL10/ICAM1	2	immunity
BP	GO:0002440	production of molecular mediator of immune response	2/7	286/18670	0.0046675	0.0194847	0.00564567	IL10/MAPK14	2	immunity
BP	GO:0002449	lymphocyte mediated immunity	2/7	352/18670	0.00699159	0.023636	0.0068485	IL10/ICAM1	2	immunity
BP	GO:0002460	adaptive immune response based on somatic recombination of immune receptors built from immunoglobulin superfamily domains	2/7	361/18670	0.00734233	0.0240398	0.00696551	IL10/ICAM1	2	immunity
BP	GO:0002719	negative regulation of cytokine production involved in immune response	1/7	25/18670	0.00933725	0.0267979	0.00776466	IL10	1	immunity
BP	GO:0002697	regulation of immune effector process	2/7	458/18670	0.0116206	0.0301821	0.00874522	IL10/MAPK14	2	immunity
BP	GO:0002429	immune response-activating cell surface receptor signaling pathway	2/7	473/18670	0.0123617	0.0311895	0.00903713	MAPK1/PRKCB	2	immunity
BP	GO:0002701	negative regulation of production of molecular mediator of immune response	1/7	35/18670	0.0130512	0.0318105	0.00921705	IL10	1	immunity
BP	GO:0042092	type 2 immune response	1/7	35/18670	0.0130512	0.0318105	0.00921705	IL10	1	immunity
BP	GO:0002204	somatic recombination of immunoglobulin genes involved in immune response	1/7	47/18670	0.0174921	0.0369815	0.0107153	IL10	1	immunity
BP	GO:0002208	somatic diversification of immunoglobulins involved in immune response	1/7	47/18670	0.0174921	0.0369815	0.0107153	IL10	1	immunity
BP	GO:0002712	regulation of B cell mediated immunity	1/7	51/18670	0.0189686	0.0384056	0.011128	IL10	1	immunity
BP	GO:0002889	regulation of immunoglobulin mediated immune response	1/7	51/18670	0.0189686	0.0384056	0.011128	IL10	1	immunity
BP	GO:0016447	somatic recombination of immunoglobulin gene segments	1/7	52/18670	0.0193374	0.0388781	0.0112649	IL10	1	immunity
BP	GO:0002720	positive regulation of cytokine production involved in immune response	1/7	54/18670	0.0200747	0.0396658	0.0114931	MAPK14	1	immunity
BP	GO:0002381	immunoglobulin production involved in immunoglobulin mediated immune response	1/7	56/18670	0.0208116	0.0404259	0.0117133	IL10	1	immunity
BP	GO:0002562	somatic diversification of immune receptors via germline recombination within a single locus	1/7	62/18670	0.0230192	0.0428299	0.0124099	IL10	1	immunity
BP	GO:0002637	regulation of immunoglobulin production	1/7	63/18670	0.0233867	0.0433731	0.0125673	IL10	1	immunity
BP	GO:0016445	somatic diversification of immunoglobulins	1/7	64/18670	0.0237541	0.0436316	0.0126422	IL10	1	immunity
BP	GO:0002312	B cell activation involved in immune response	1/7	73/18670	0.0270554	0.0470601	0.0136356	IL10	1	immunity
BP	GO:0002200	somatic diversification of immune receptors	1/7	75/18670	0.0277878	0.0478984	0.0138785	IL10	1	immunity
BP	GO:0050715	positive regulation of cytokine secretion	2/7	139/18670	0.00112774	0.00757105	0.0021937	IL10/MAPK14	2	cytokine
BP	GO:0050707	regulation of cytokine secretion	2/7	210/18670	0.00254776	0.0135409	0.00392345	IL10/MAPK14	2	cytokine
BP	GO:0050663	cytokine secretion	2/7	240/18670	0.00331182	0.0163175	0.00472796	IL10/MAPK14	2	cytokine
BP	GO:0001819	positive regulation of cytokine production	2/7	464/18670	0.0119146	0.0304558	0.00882453	IL10/MAPK14	2	cytokine
BP	GO:0042036	negative regulation of cytokine biosynthetic process	1/7	40/18670	0.0149037	0.0342874	0.00993472	IL10	1	cytokine
BP	GO:1900015	regulation of cytokine production involved in inflammatory response	1/7	46/18670	0.0171227	0.0366732	0.010626	MAPK14	1	cytokine
BP	GO:0002534	cytokine production involved in inflammatory response	1/7	49/18670	0.0182306	0.0377775	0.010946	MAPK14	1	cytokine
BP	GO:1903556	negative regulation of tumor necrosis factor superfamily cytokine production	1/7	72/18670	0.0266891	0.0467772	0.0135536	IL10	1	cytokine
BP	GO:0050710	negative regulation of cytokine secretion	1/7	74/18670	0.0274217	0.0474812	0.0137576	IL10	1	cytokine
BP	GO:0002437	inflammatory response to antigenic stimulus	2/7	46/18670	0.00012374	0.00231872	0.000671846	IL10/ICAM1	2	inflammatory
BP	GO:0050727	regulation of inflammatory response	3/7	485/18670	0.00056407	0.0049057	0.00142142	IL10/EGFR/MAPK14	3	inflammatory
BP	GO:0002862	negative regulation of inflammatory response to antigenic stimulus	1/7	12/18670	0.00449125	0.0188863	0.00547228	IL10	1	inflammatory
BP	GO:0002544	chronic inflammatory response	1/7	19/18670	0.00710315	0.023636	0.0068485	IL10	1	inflammatory
BP	GO:0002438	acute inflammatory response to antigenic stimulus	1/7	21/18670	0.00784833	0.0245501	0.00711336	ICAM1	1	inflammatory
BP	GO:0002861	regulation of inflammatory response to antigenic stimulus	1/7	24/18670	0.0089652	0.026122	0.0075688	IL10	1	inflammatory
BP	GO:0002532	production of molecular mediator involved in inflammatory response	1/7	72/18670	0.0266891	0.0467772	0.0135536	MAPK14	1	inflammatory
BP	GO:0150076	neuroinflammatory response	1/7	75/18670	0.0277878	0.0478984	0.0138785	EGFR	1	inflammatory
